# Supplementary material
Source: publisher figshare collection journal article supplement (https://acs.figshare.com/ndownloader/files/4200637)

## Supporting Information

### Regioselective Base-Free Intermolecular Aminohydroxylations of Hindered and Functionalized Alkenes

Zhiwei Ma, Bradley C. Naylor, Brad M. Loertscher, Danny D. Hafen, Jasmine M. Li, and  
Steven L. Castle\*

*Department of Chemistry and Biochemistry  
Brigham Young University, Provo, Utah, 84602*

#### Table of Contents

|                                                  |        |
|--------------------------------------------------|--------|
| Structure Proofs of <b>33a</b> and <b>33b</b>    | S2     |
| Determination of Stereochemistry of <b>35a–c</b> | S2–S3  |
| <sup>1</sup> H and <sup>13</sup> C NMR Spectra   | S4–S41 |

**Structure Proofs of 33a and 33b.** NMR data for **33a** and **33b**, including nOe correlations and coupling constants, were consistent with the proposed structures (Figure S1). The structure proposed for carbamate **33a** was proven by its conversion into known amino diol **S1** (Scheme S1). Spectral data for **S1** were in accordance with previously reported data.<sup>1</sup>

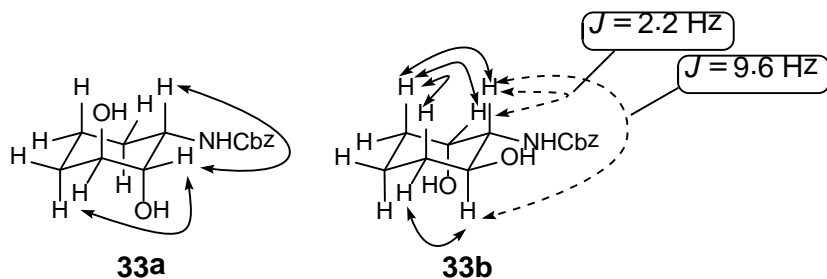

**Figure S1.** Diagnostic nOe Correlations and Coupling Constants of **33a** and **33b**.

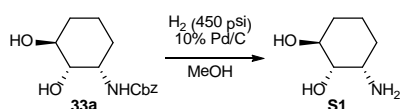

**Scheme S1.** Hydrogenation of **33a**.

**Determination of Stereochemistry of 35a–c.** Treatment of each carbamate **35a**, **35b**, and **35c** with base (7.5 N aq KOH, THF–MeOH, 16 h) afforded the corresponding oxazolidinones **S2**, **S3**, and **S4**. Assignment of the *trans* stereochemistry to **S2** and **S4** and the *cis* stereochemistry to **S3** is based on prior reports that the coupling constants of *trans* oxazolidinones are smaller than those of *cis* oxazolidinones<sup>2</sup> (Figure S2). The resulting structural assignments of **35a**, **35b**, and **35c** are consistent with the *syn* addition that is

<sup>1</sup> Aciro, C.; Davies, S. G.; Roberts, P. M.; Russell, A. J.; Smith, A. D.; Thomson, J. E. *Org. Biomol. Chem.* **2008**, *6*, 3762.

<sup>2</sup> (a) Kobayashi, S.; Isobe, T.; Ohno, M. *Tetrahedron Lett.* **1984**, *25*, 5079. (b) Kano, S.; Yokomatsu, T.; Iwasawa, H.; Shibuya, S. *Chem. Lett.* **1987**, 1531.

characteristic of the aminohydroxylation reaction (i.e., **35a** and **35c** were formed in the aminohydroxylation of **36**, but **35b** was not).

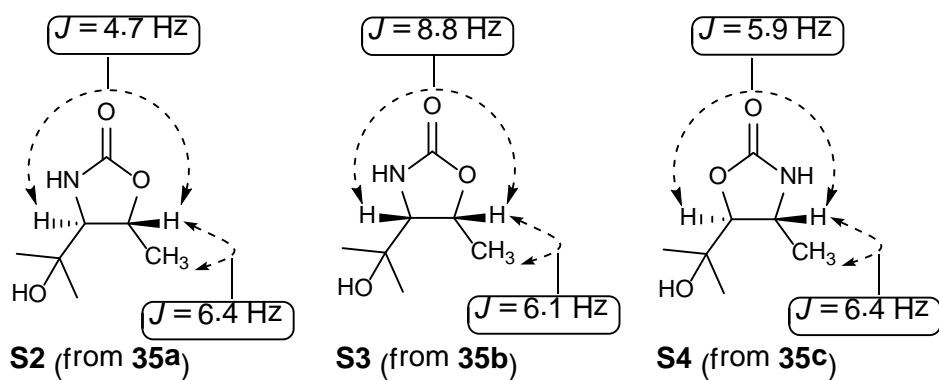

**Figure S2.** Diagnostic Coupling Constants of Oxazolidinones Derived from **35a–c**.

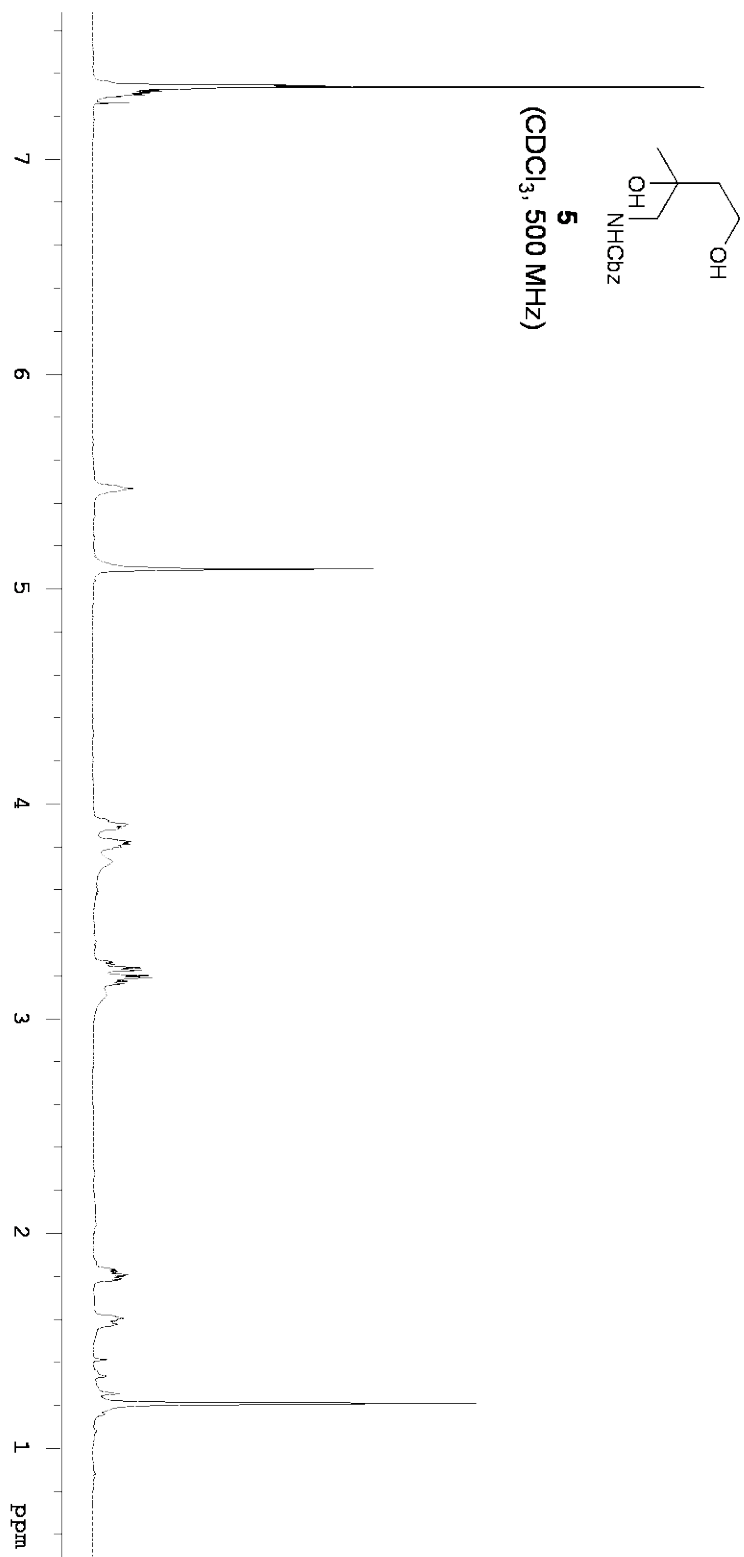

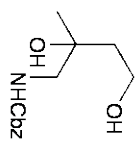

**5**

(CDCl<sub>3</sub>, 125 MHz)

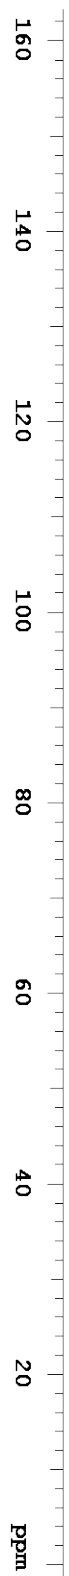

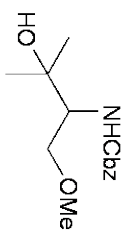

**14**  
(CDCl<sub>3</sub>, 500 MHz)

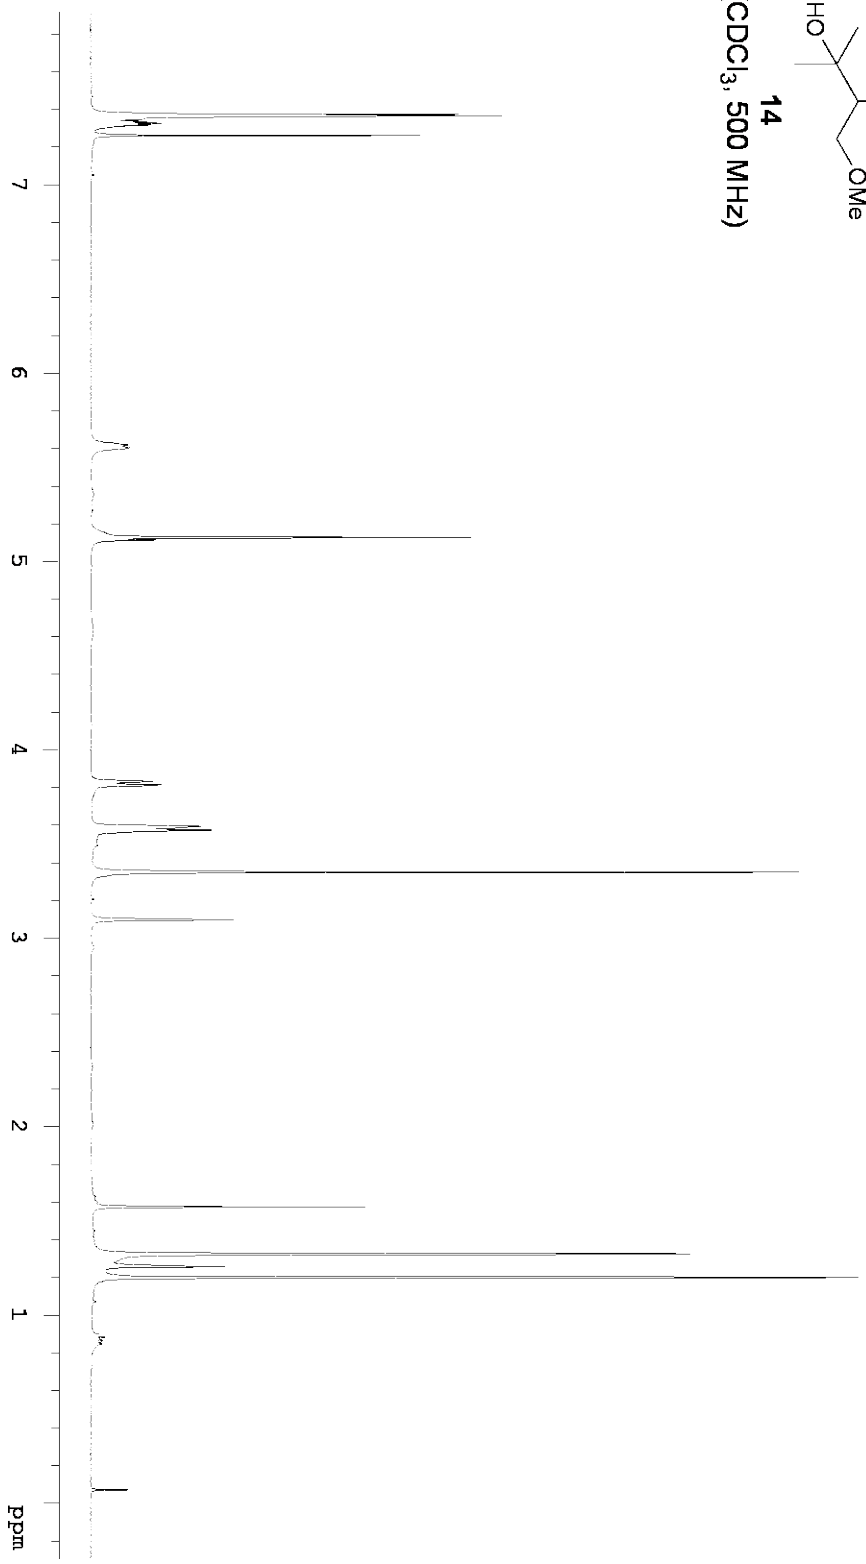

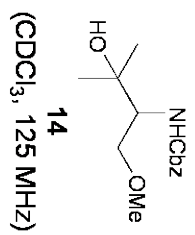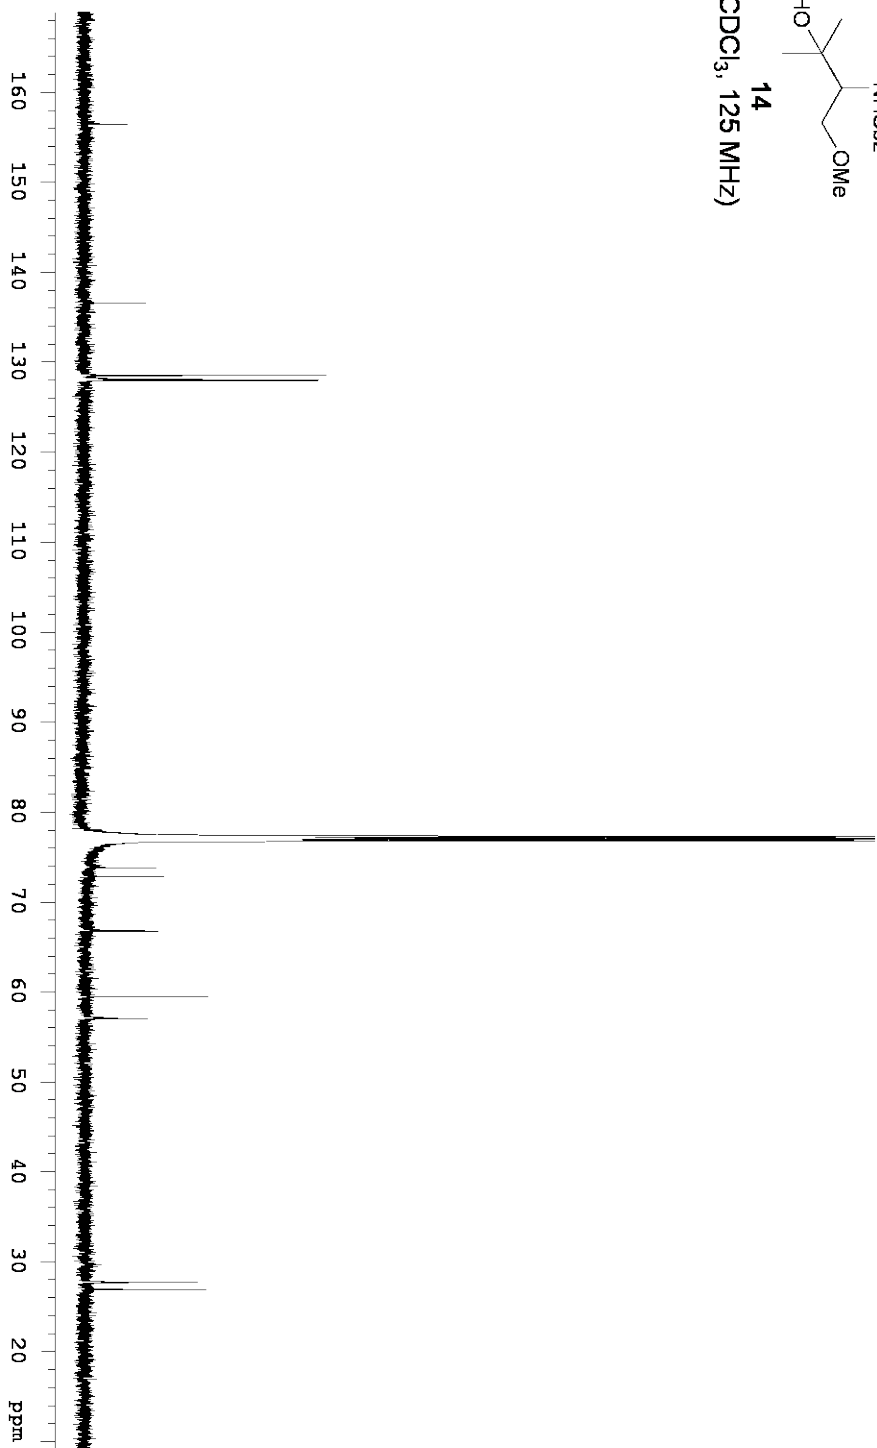

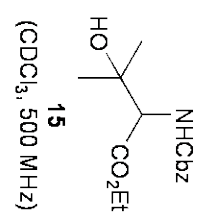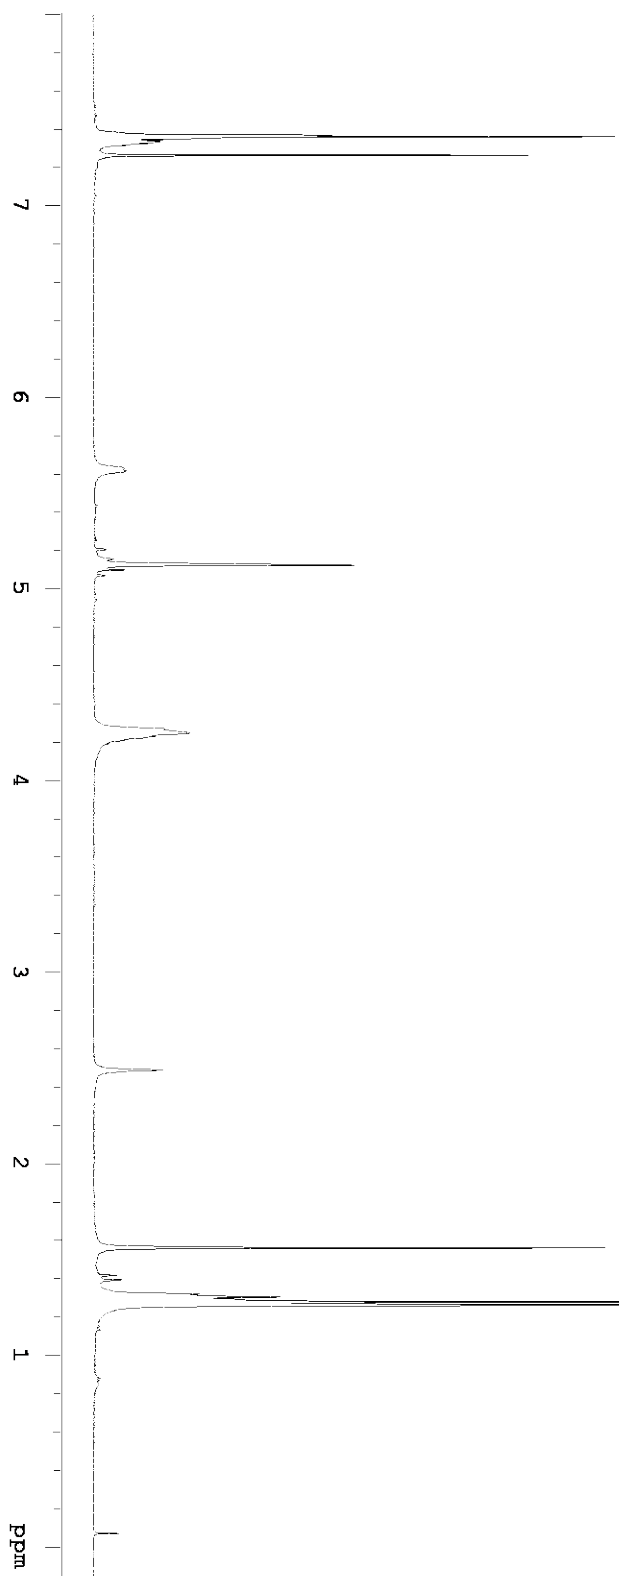



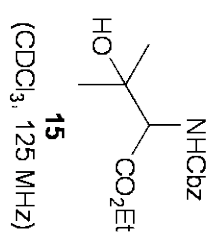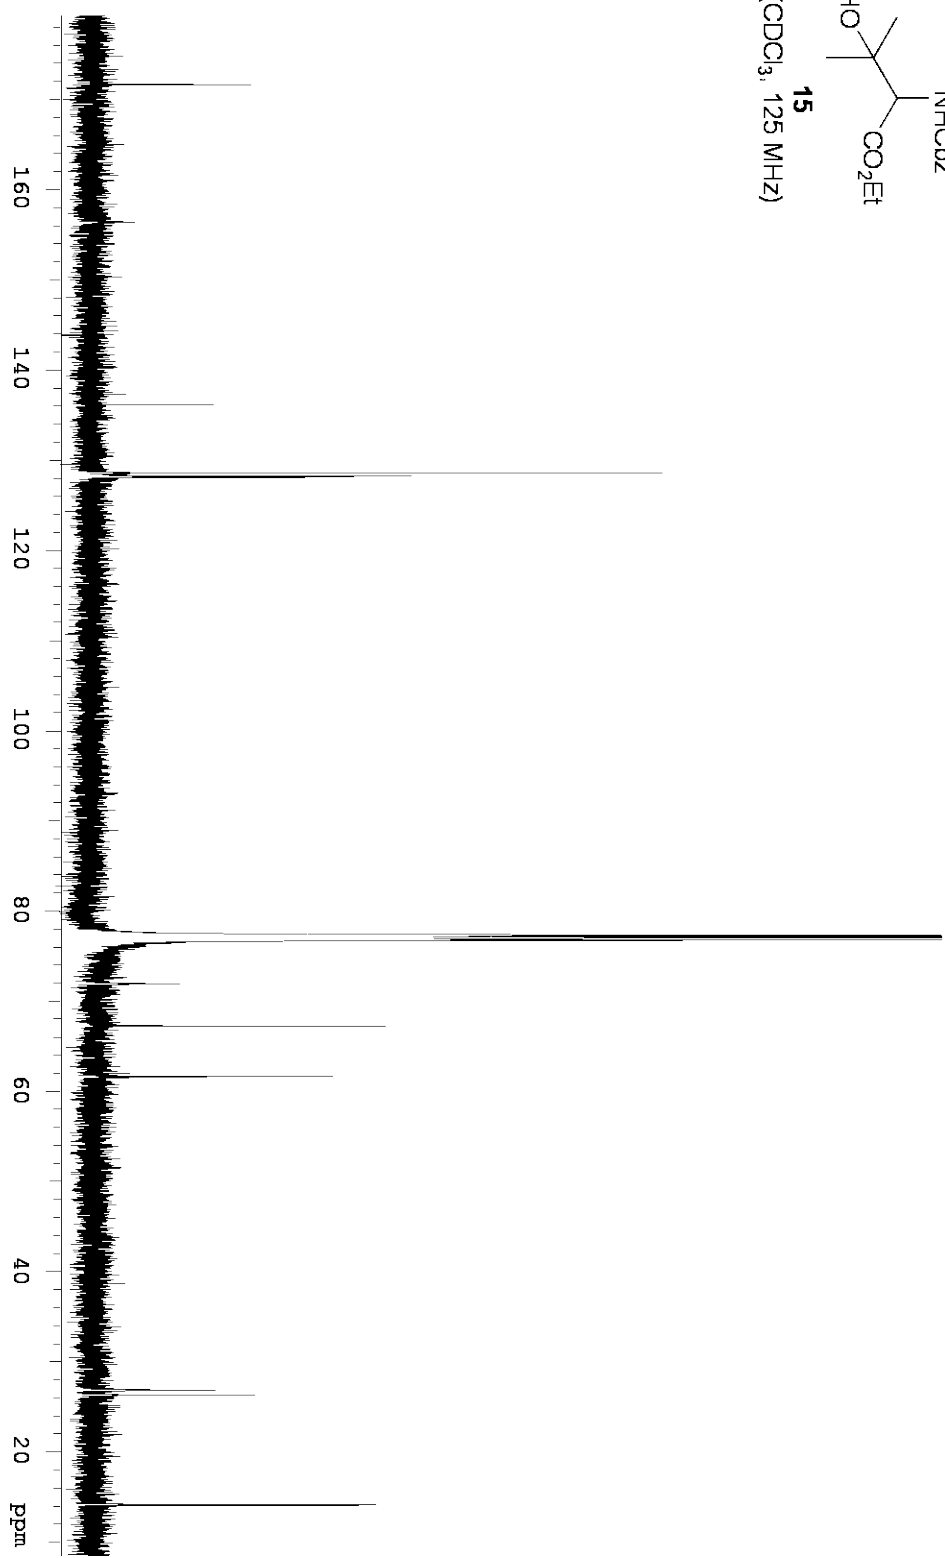

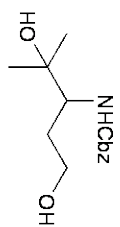

**16**  
(CDCl<sub>3</sub>, 500 MHz)

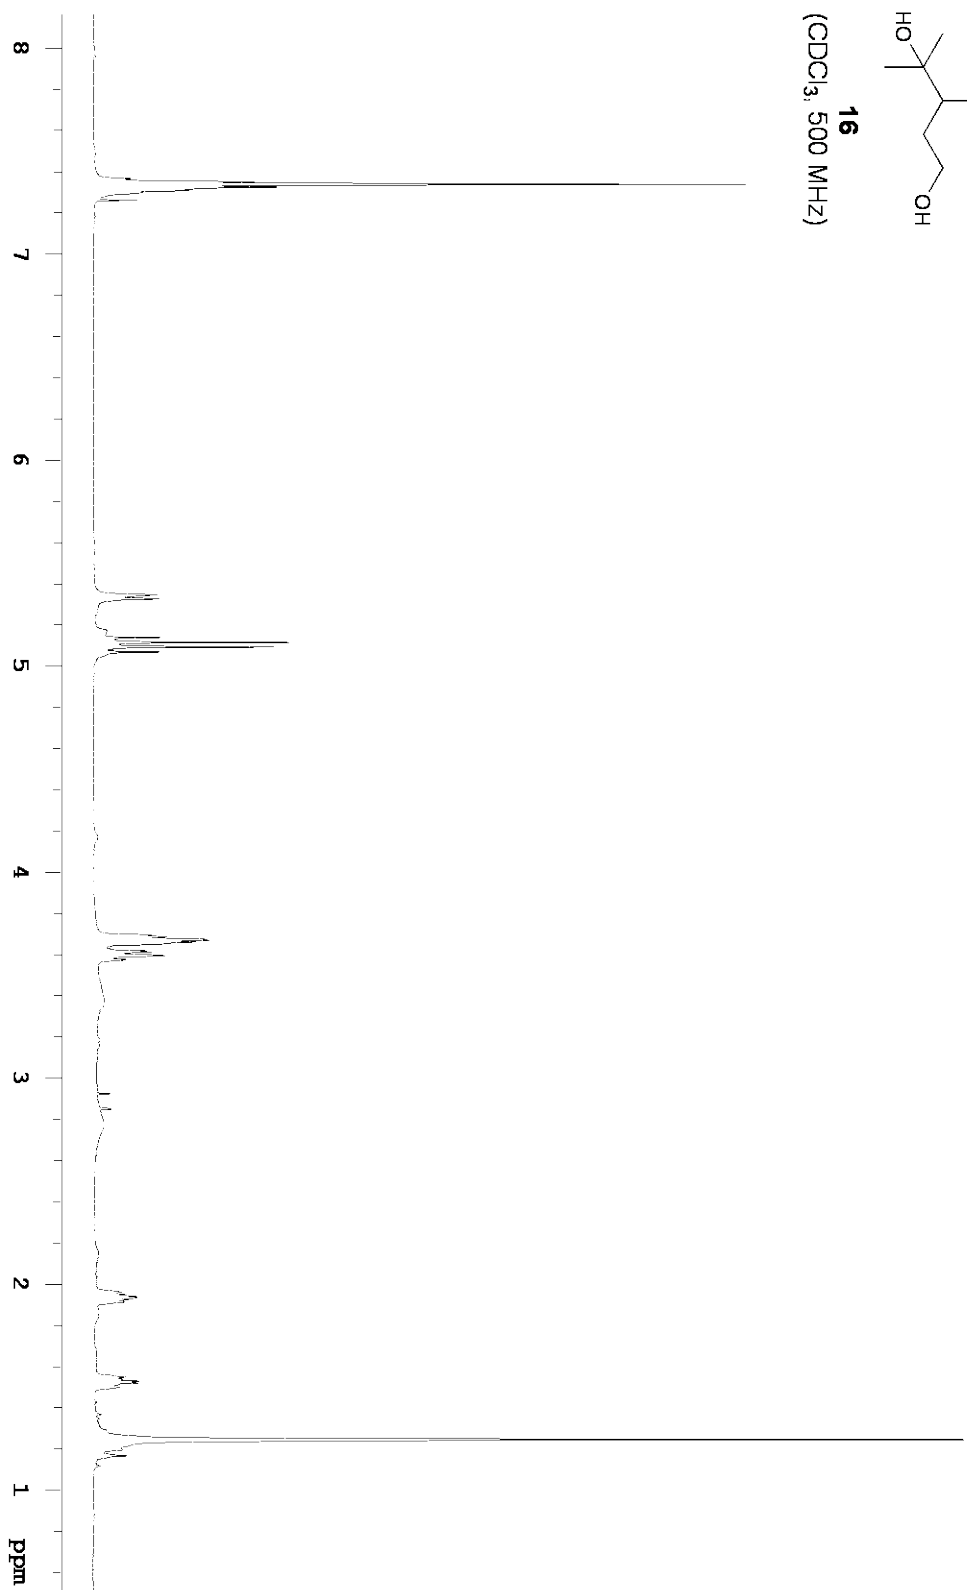

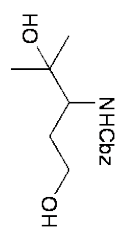

**16**

(CDCl<sub>3</sub>, 125 MHz)

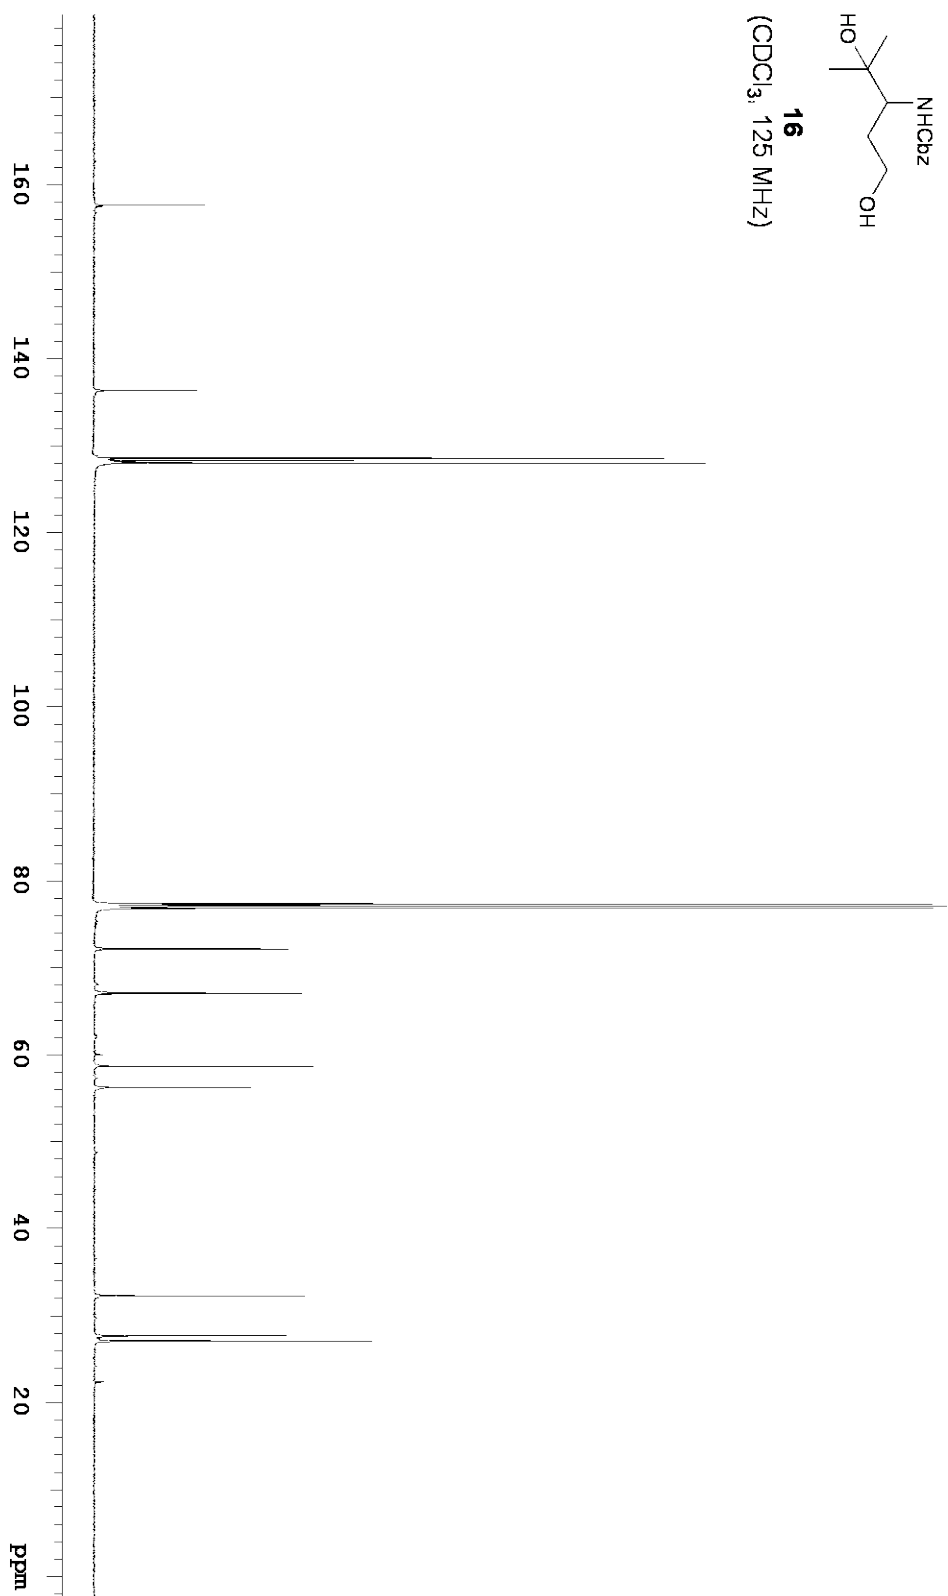

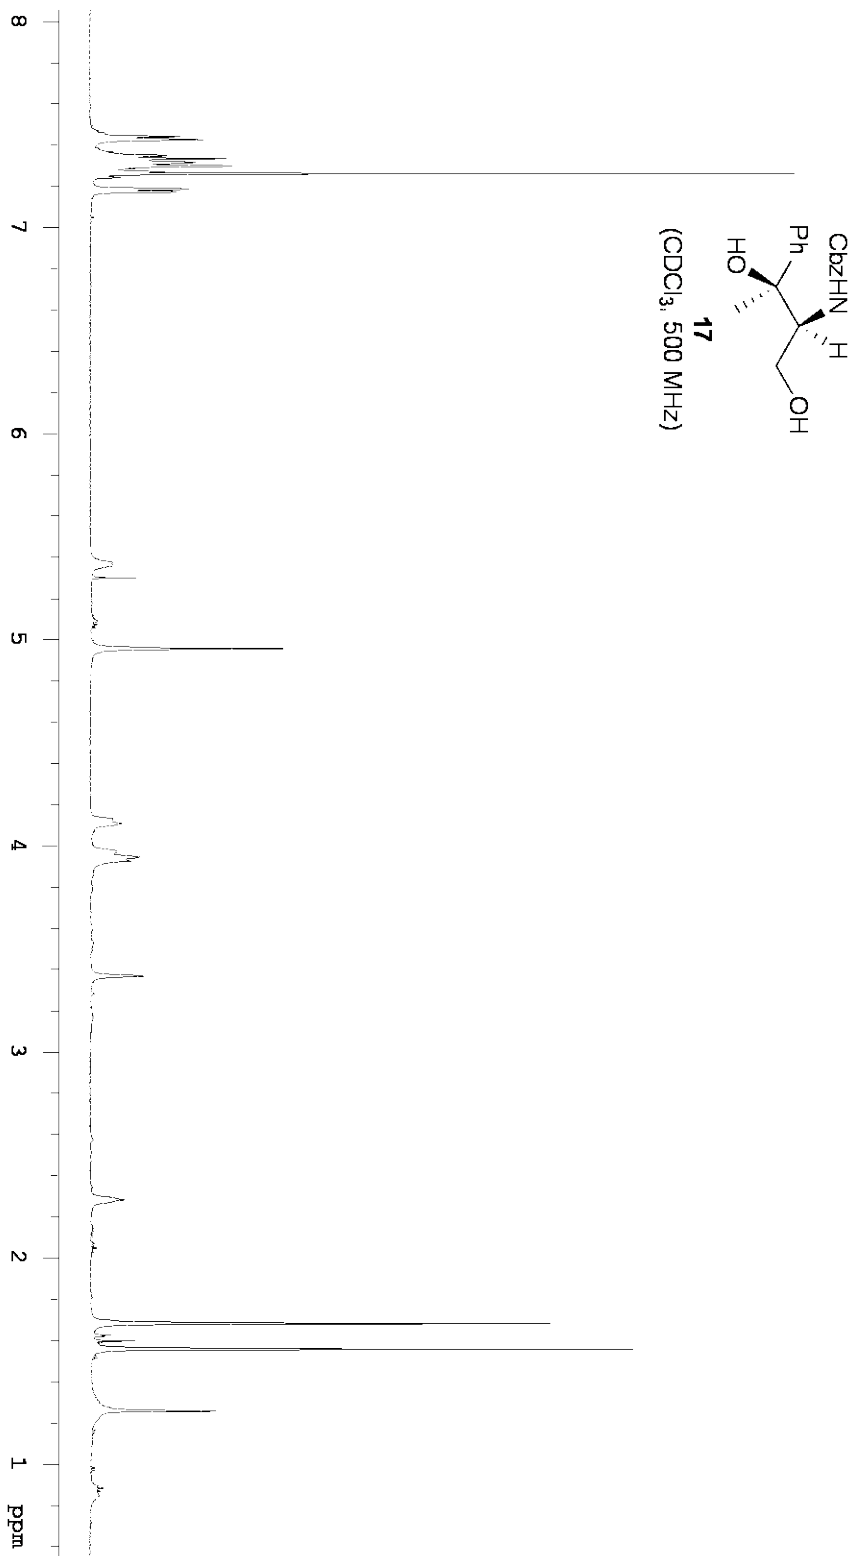

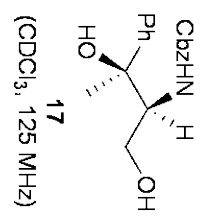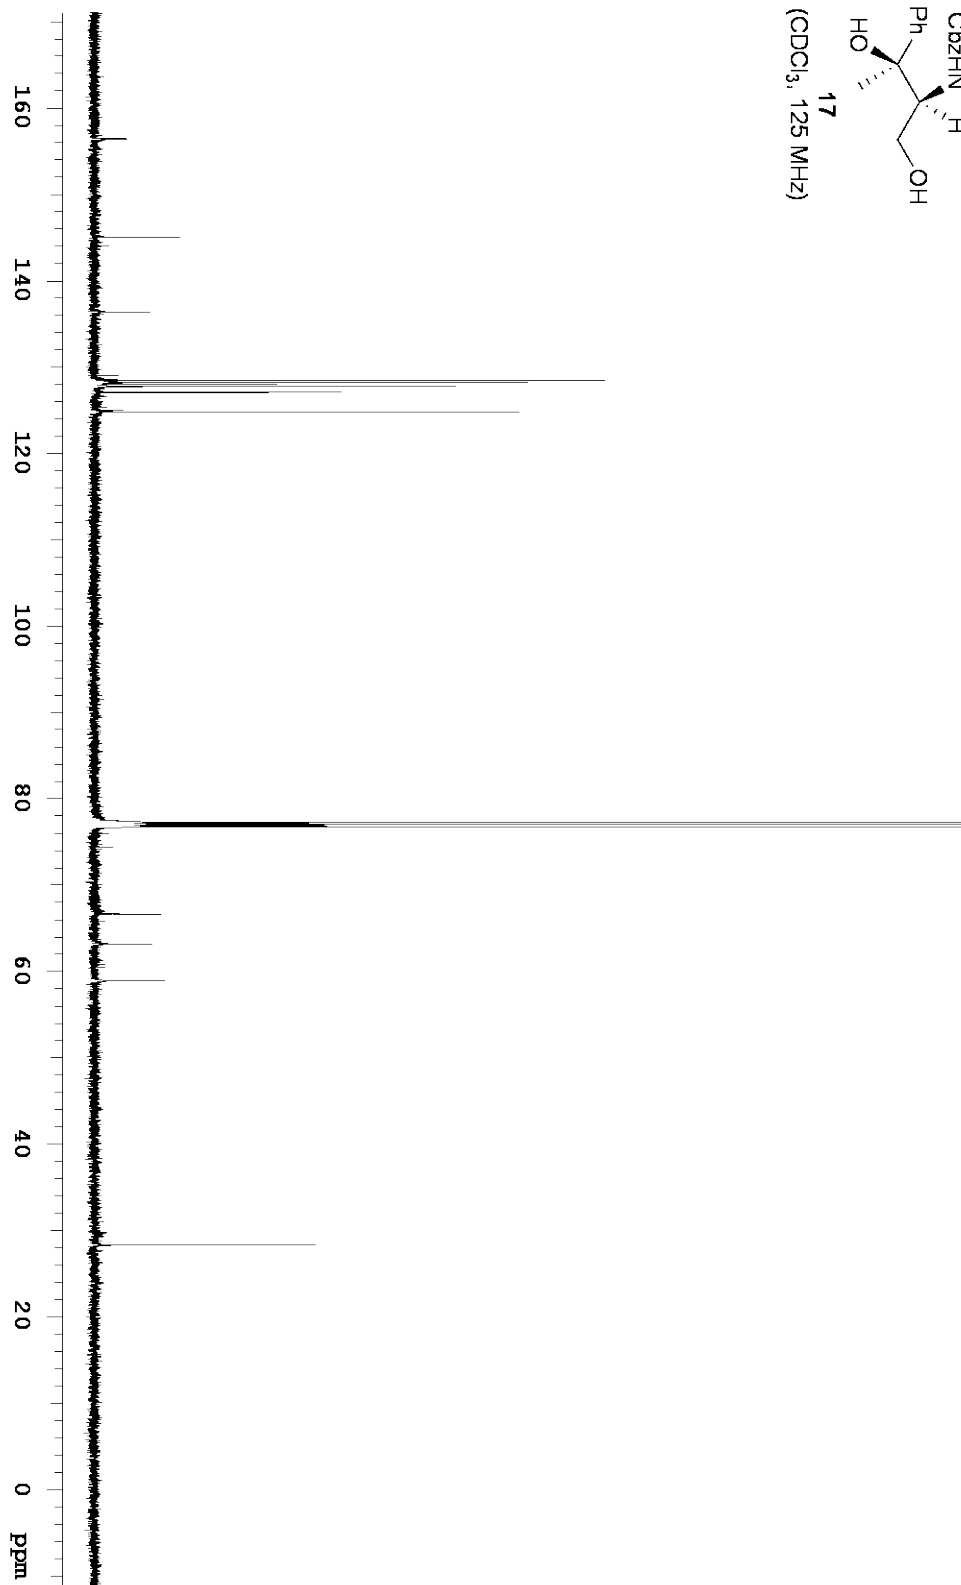

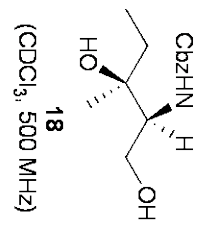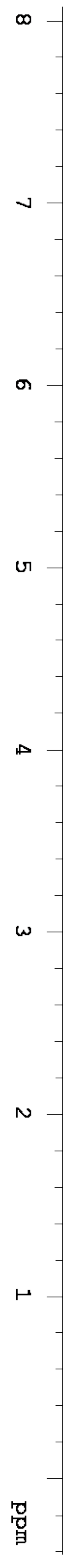

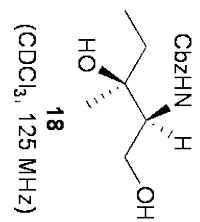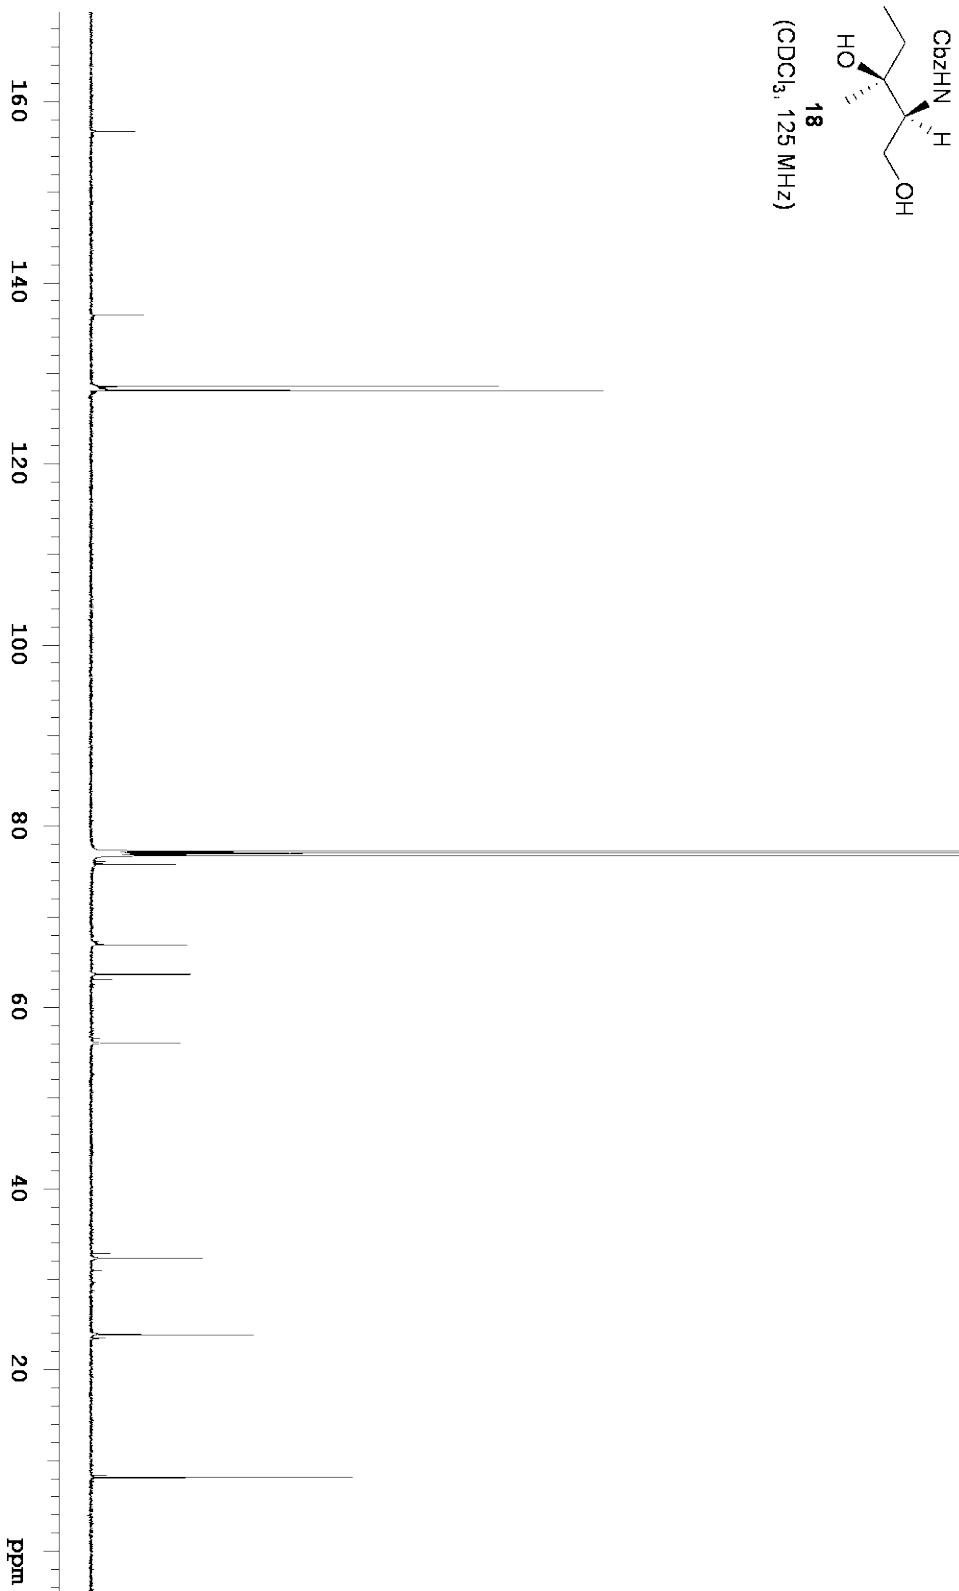

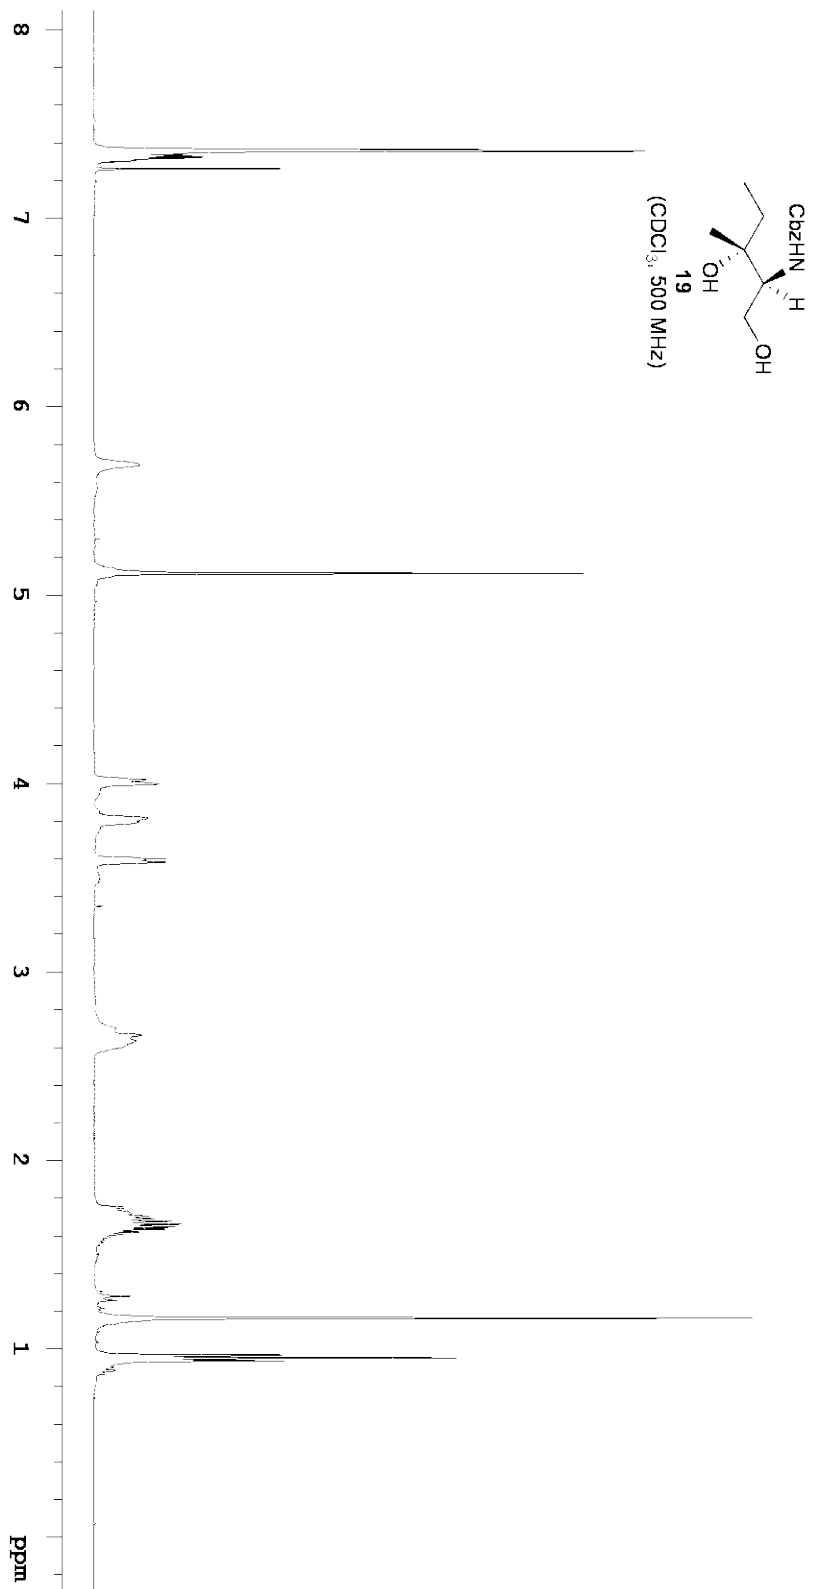



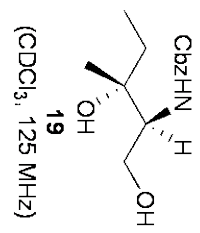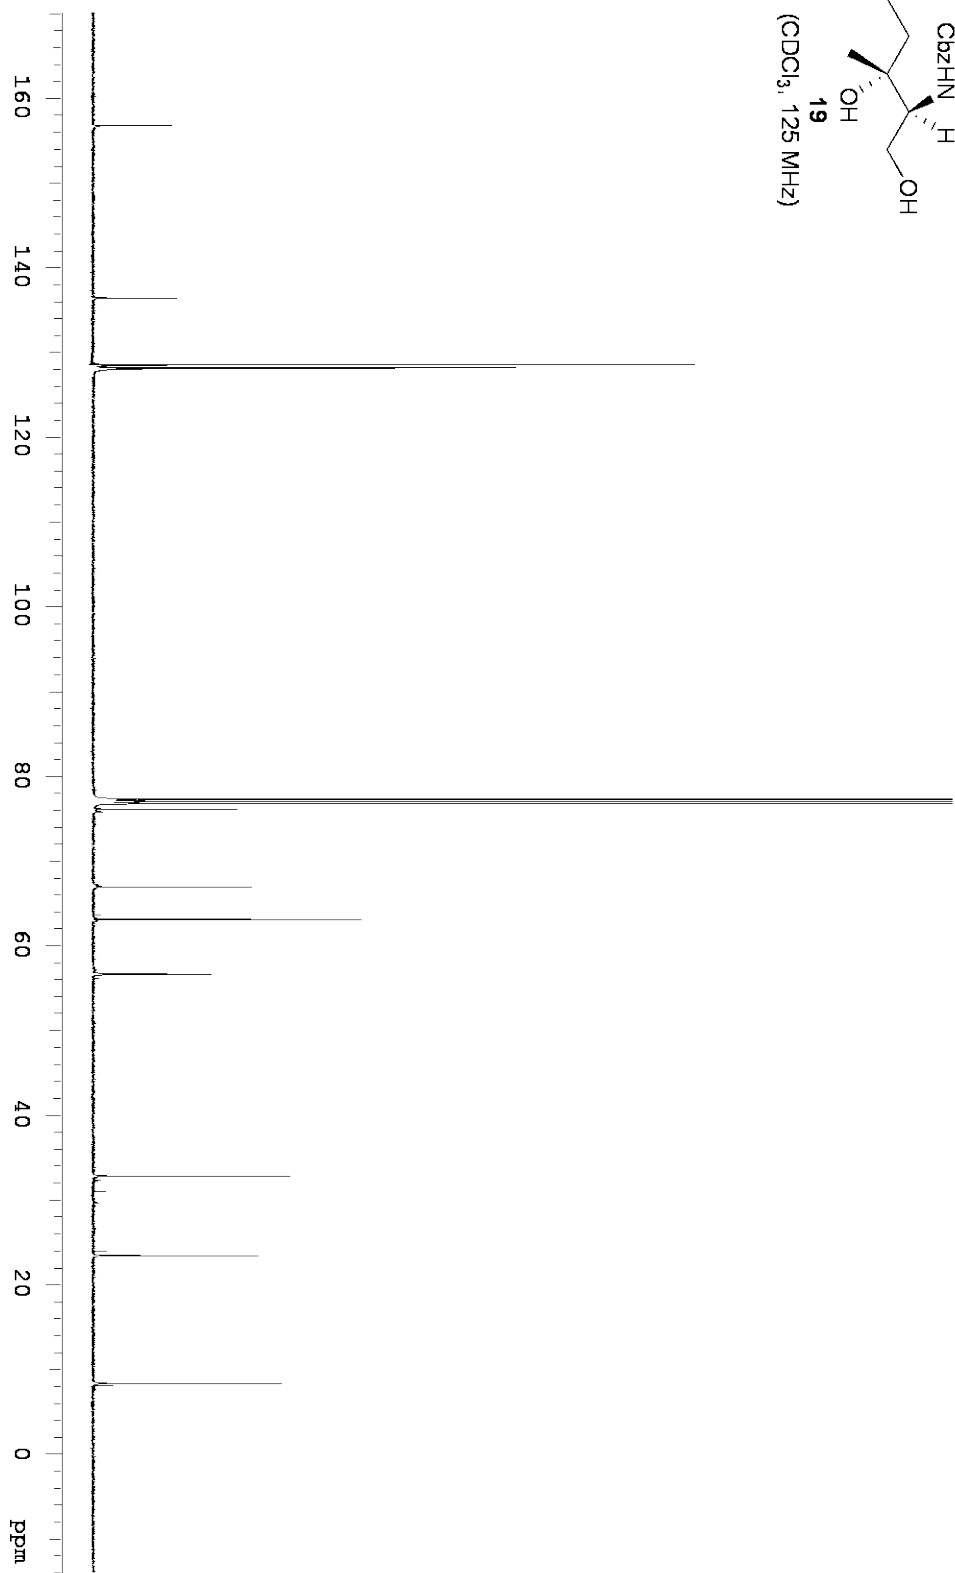

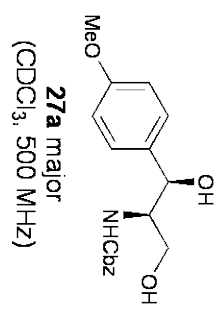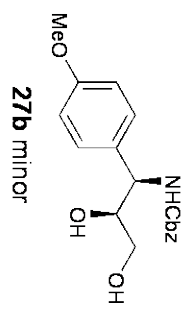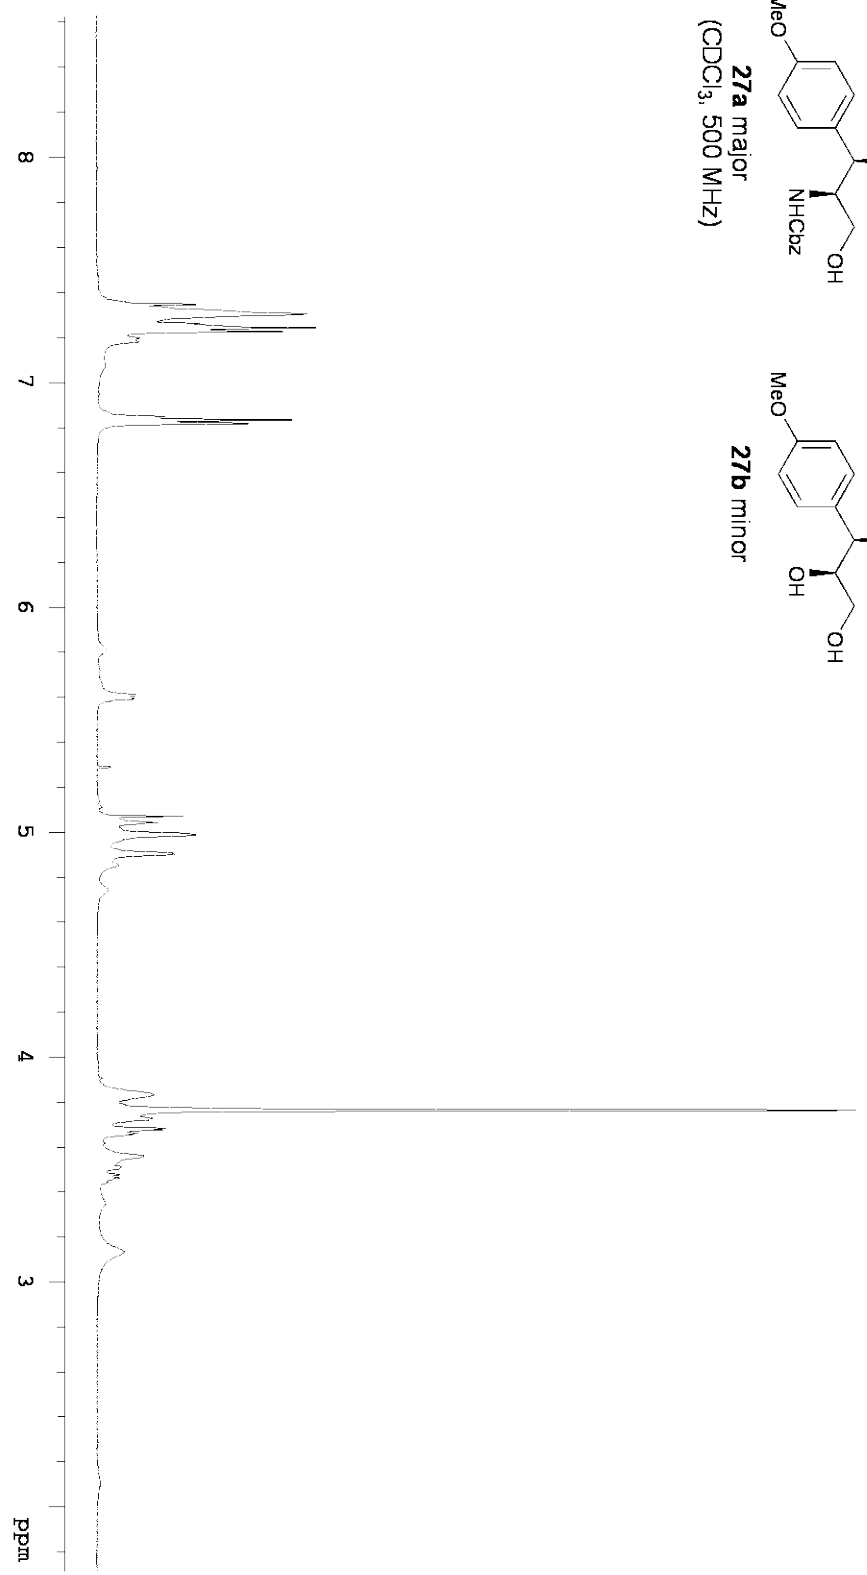

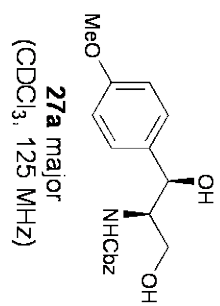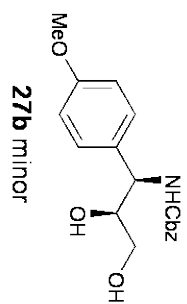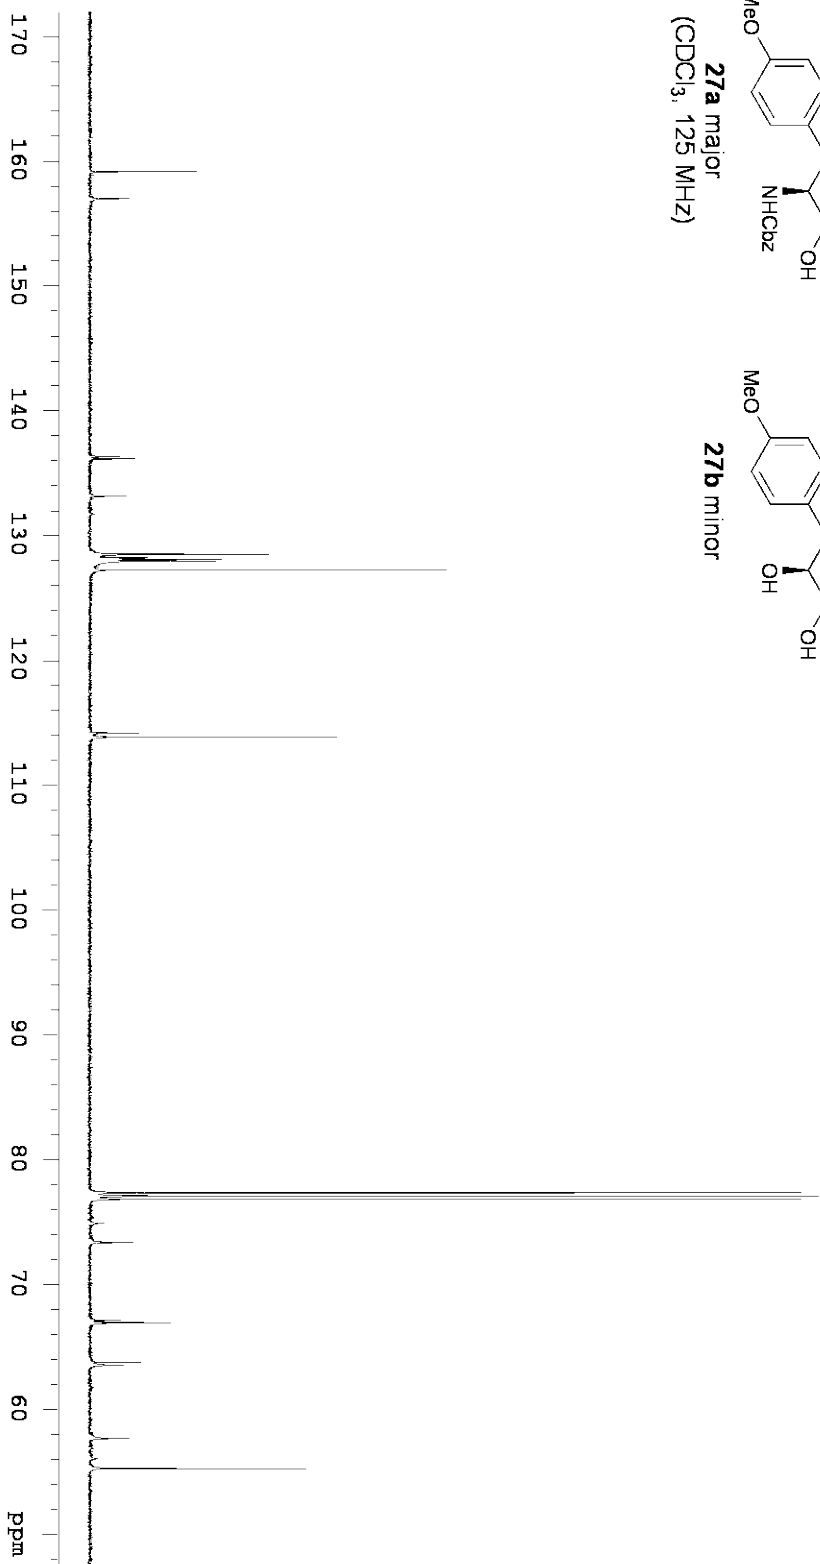

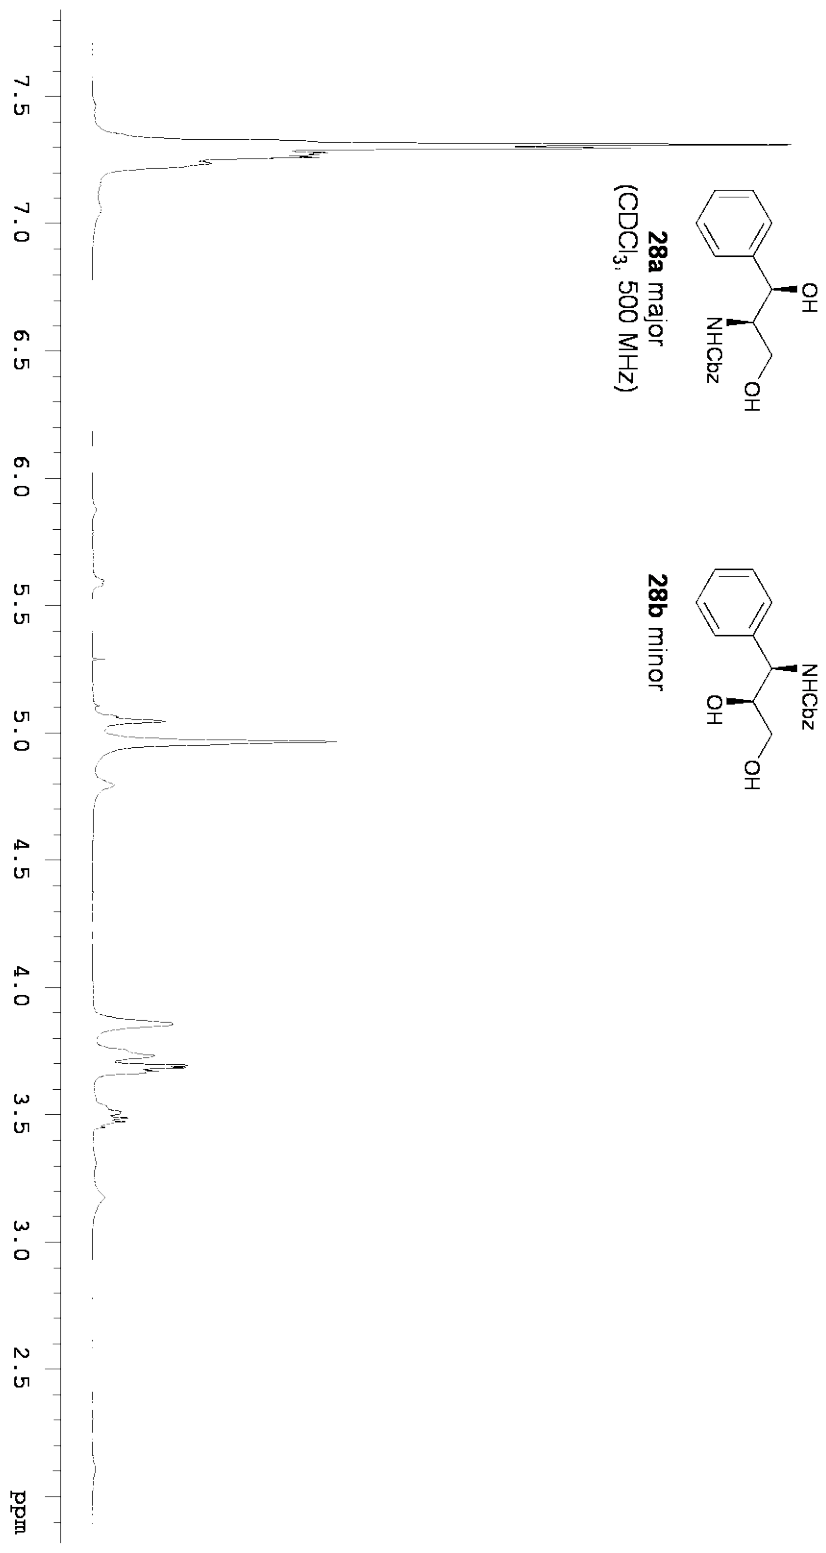

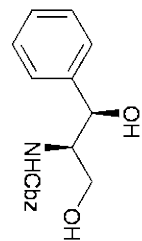

**28a** major  
(CDCl<sub>3</sub>, 125 MHz)

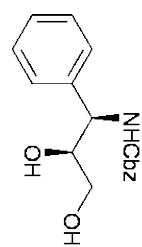

**28b** minor

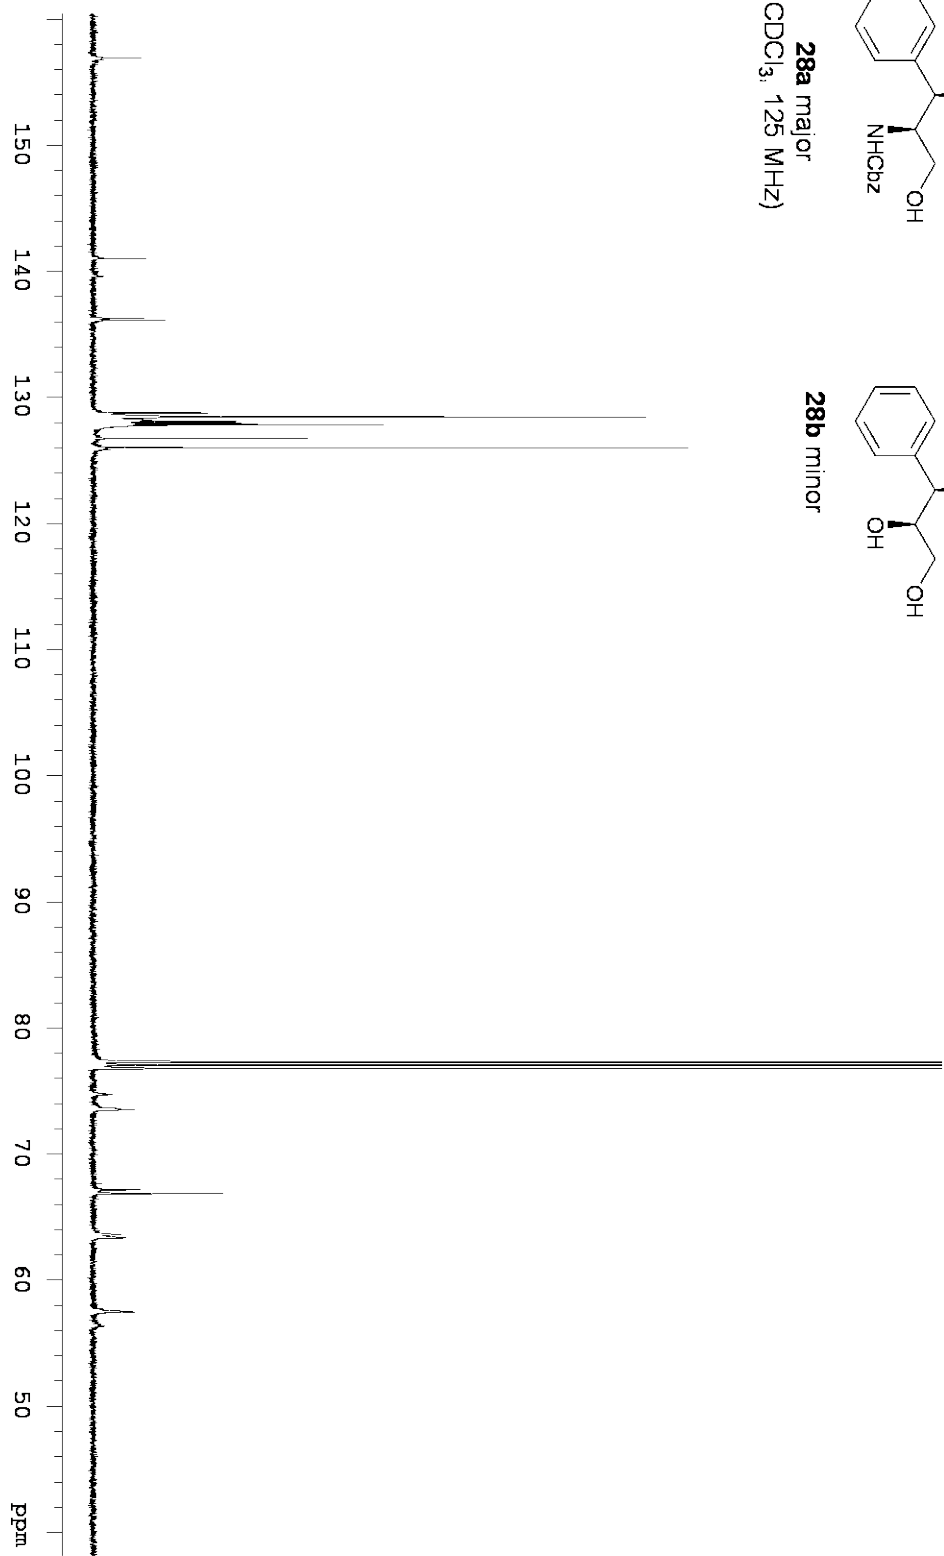

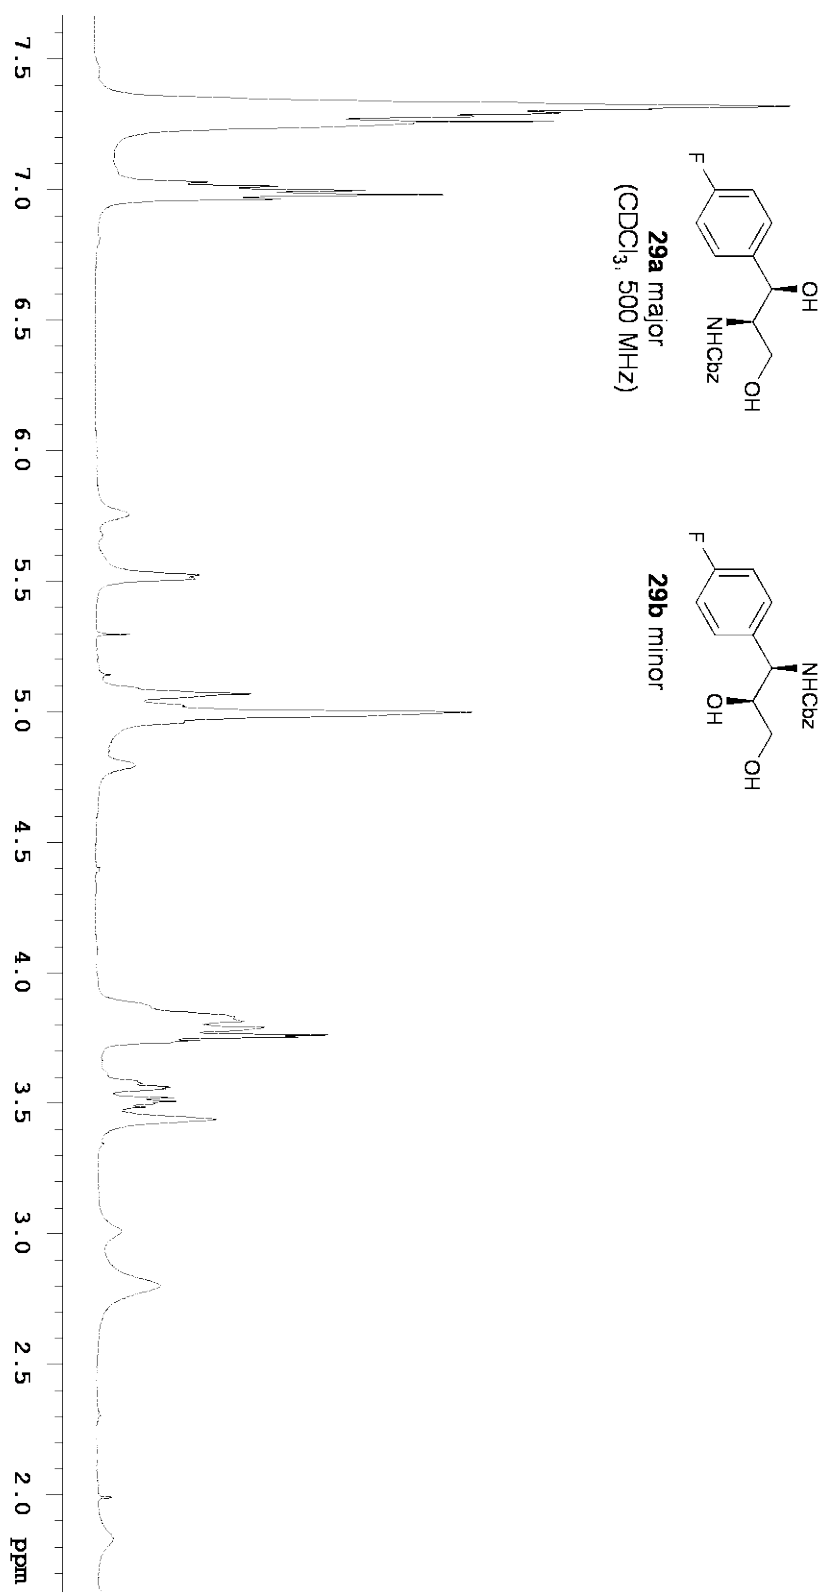

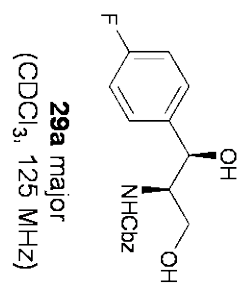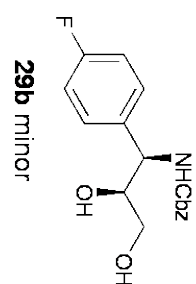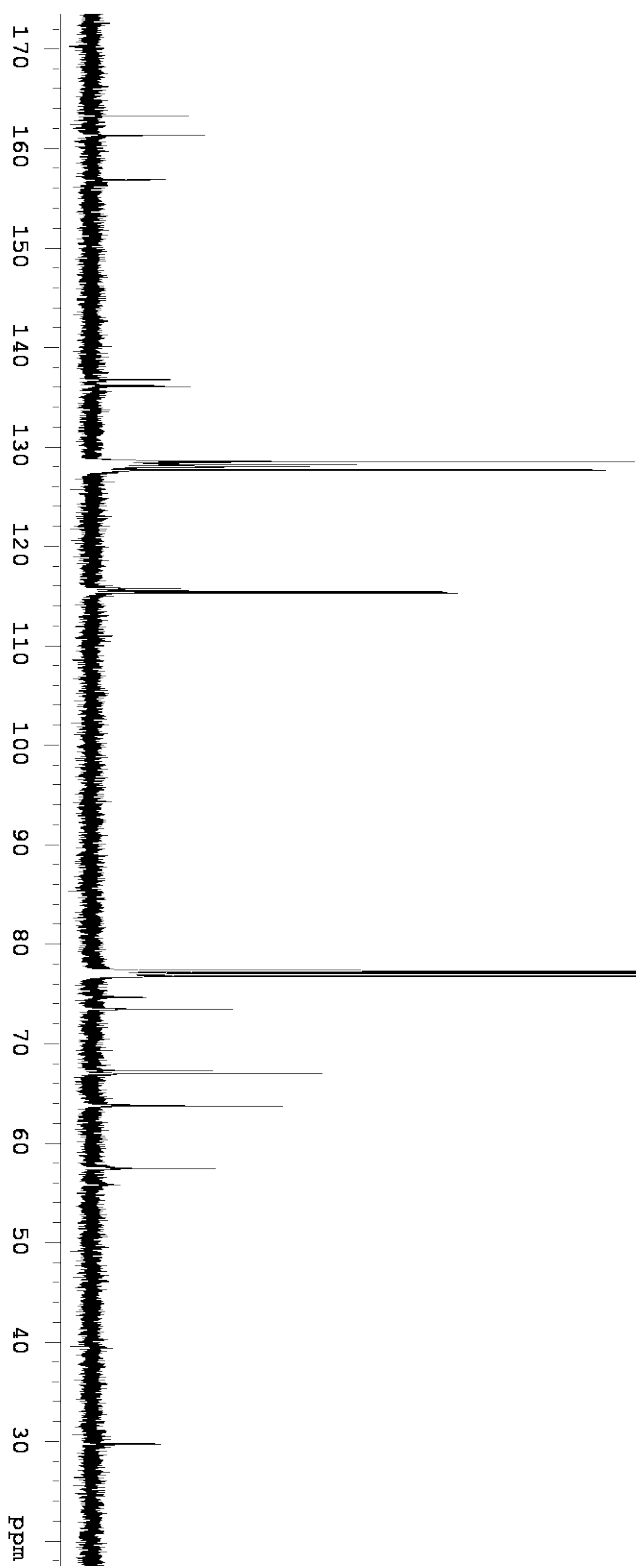

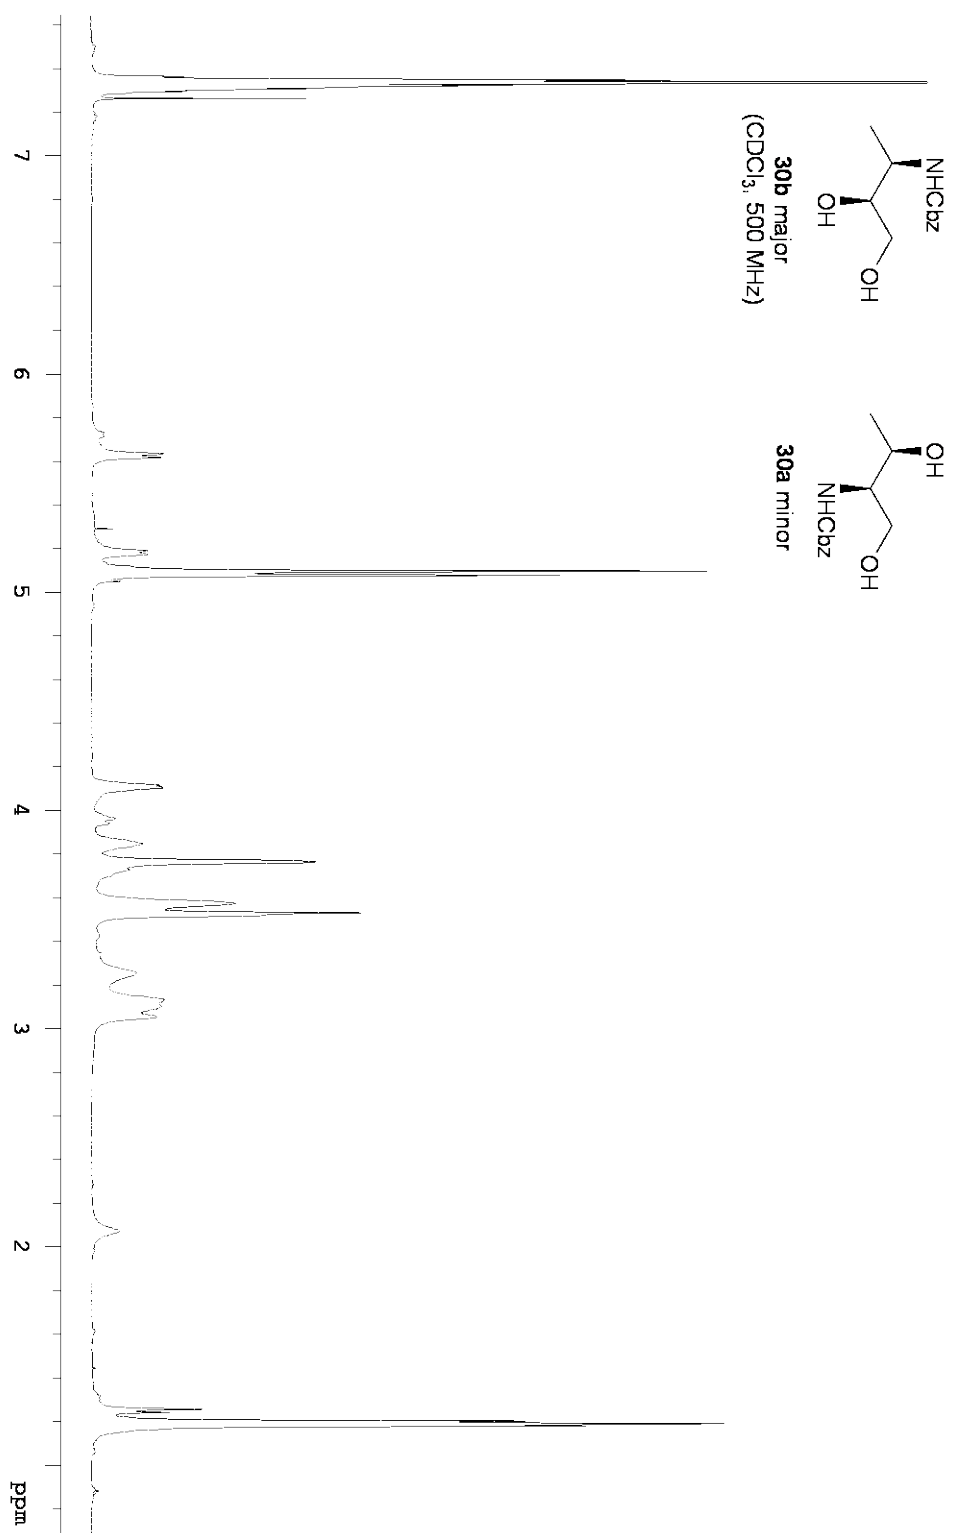



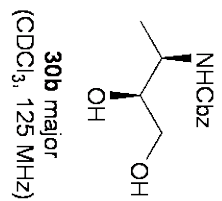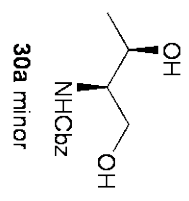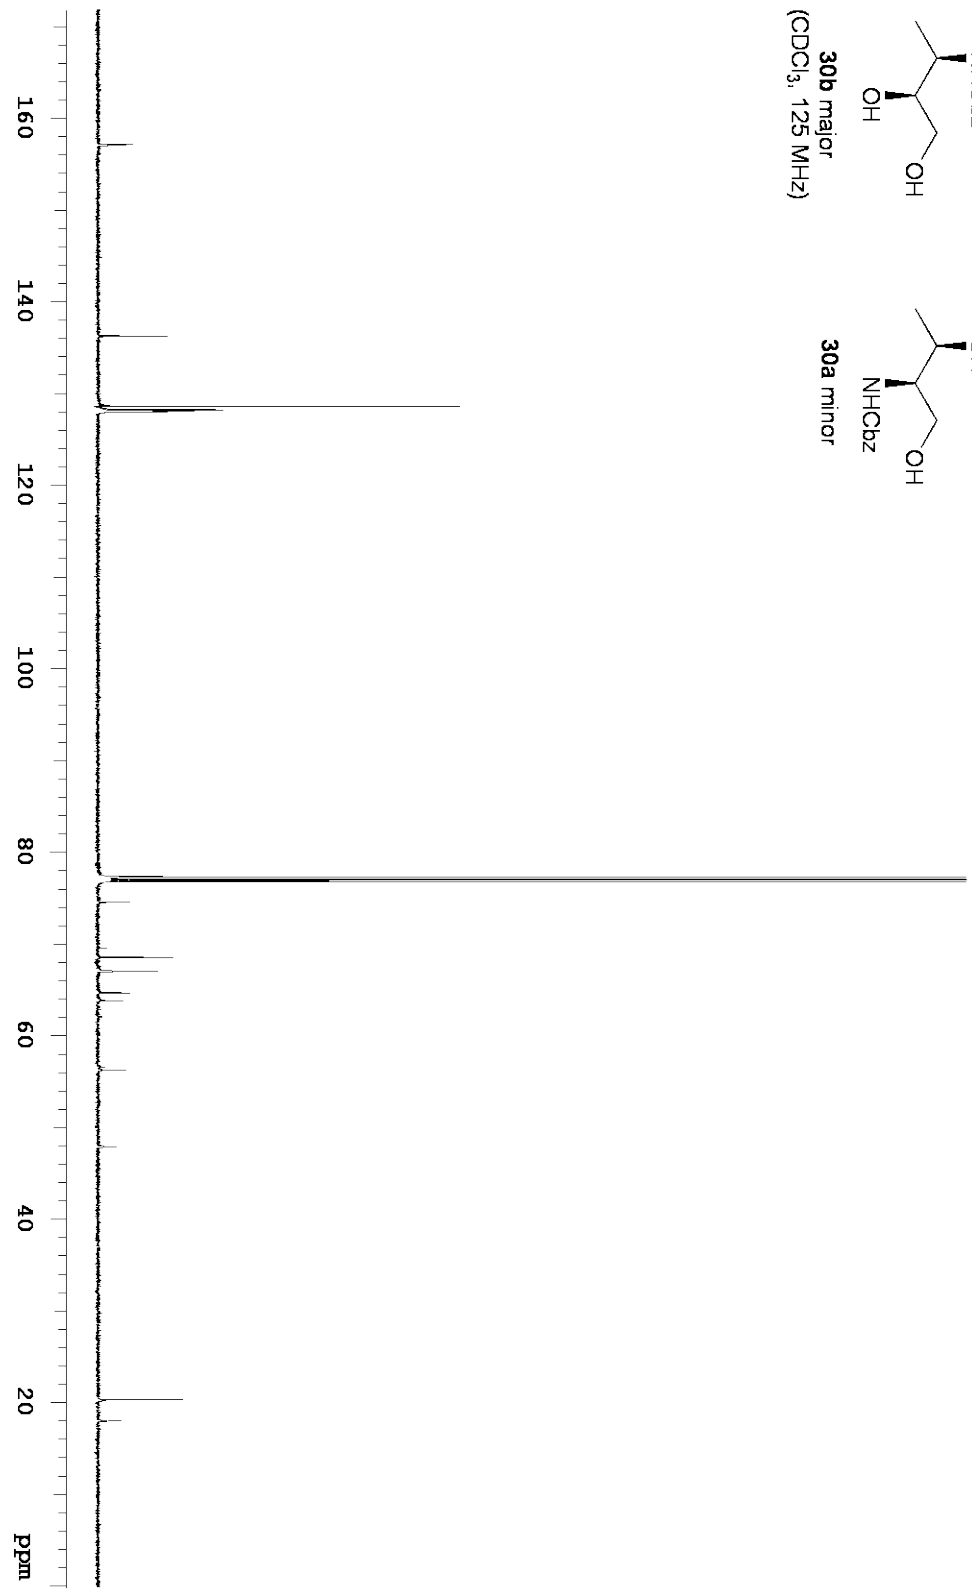

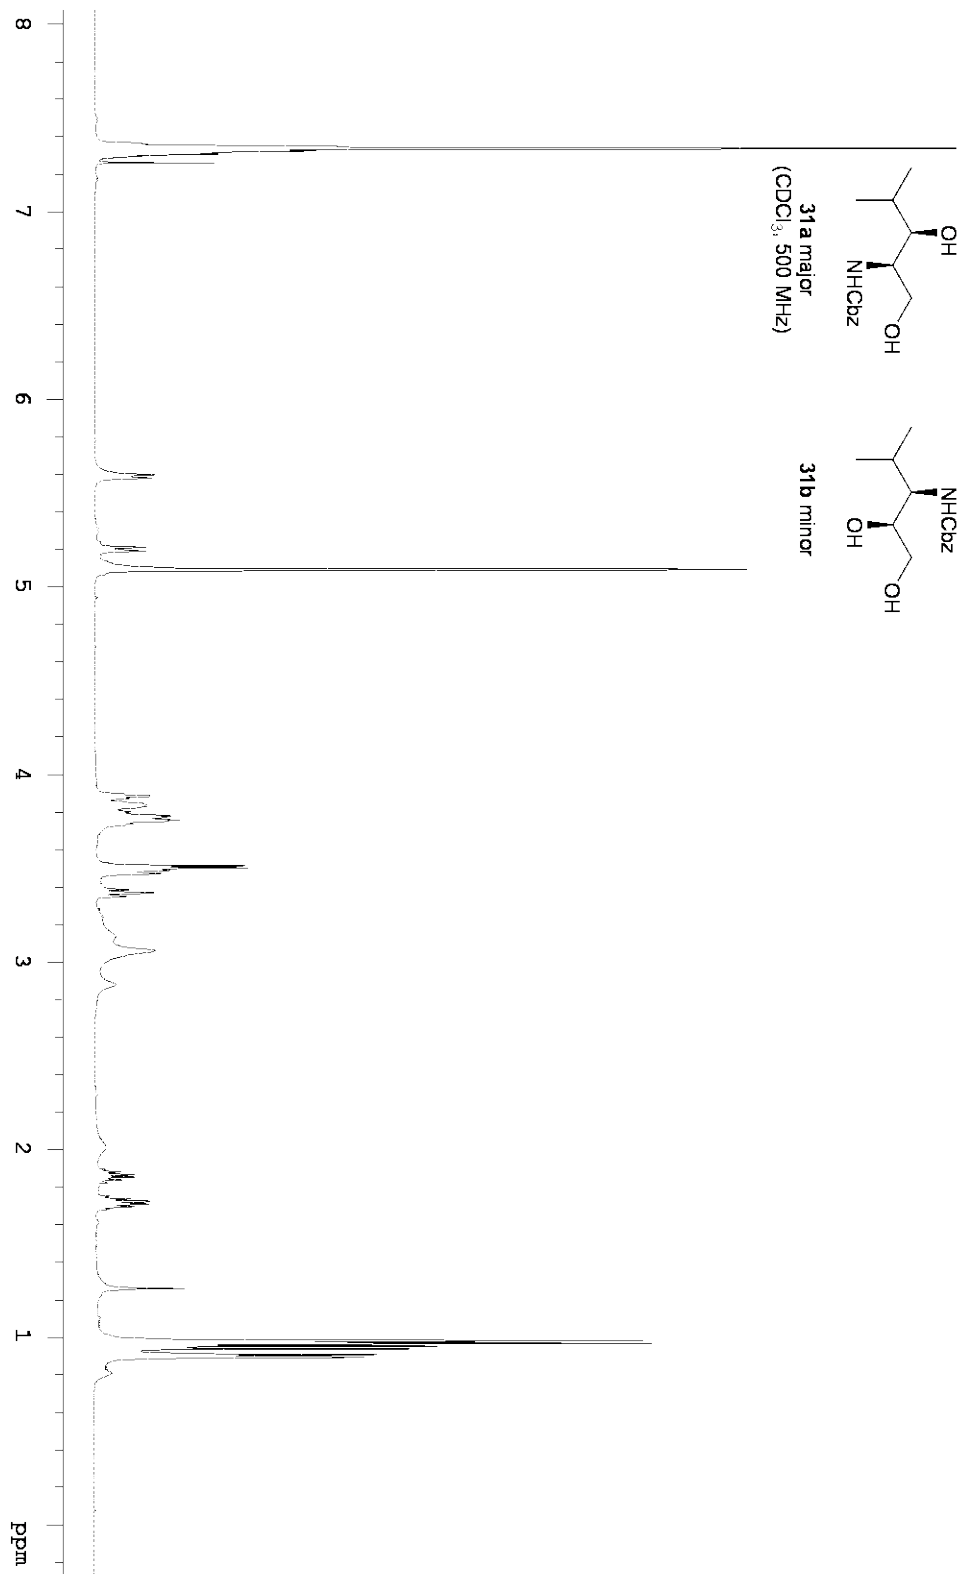

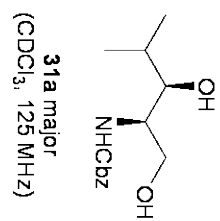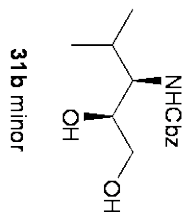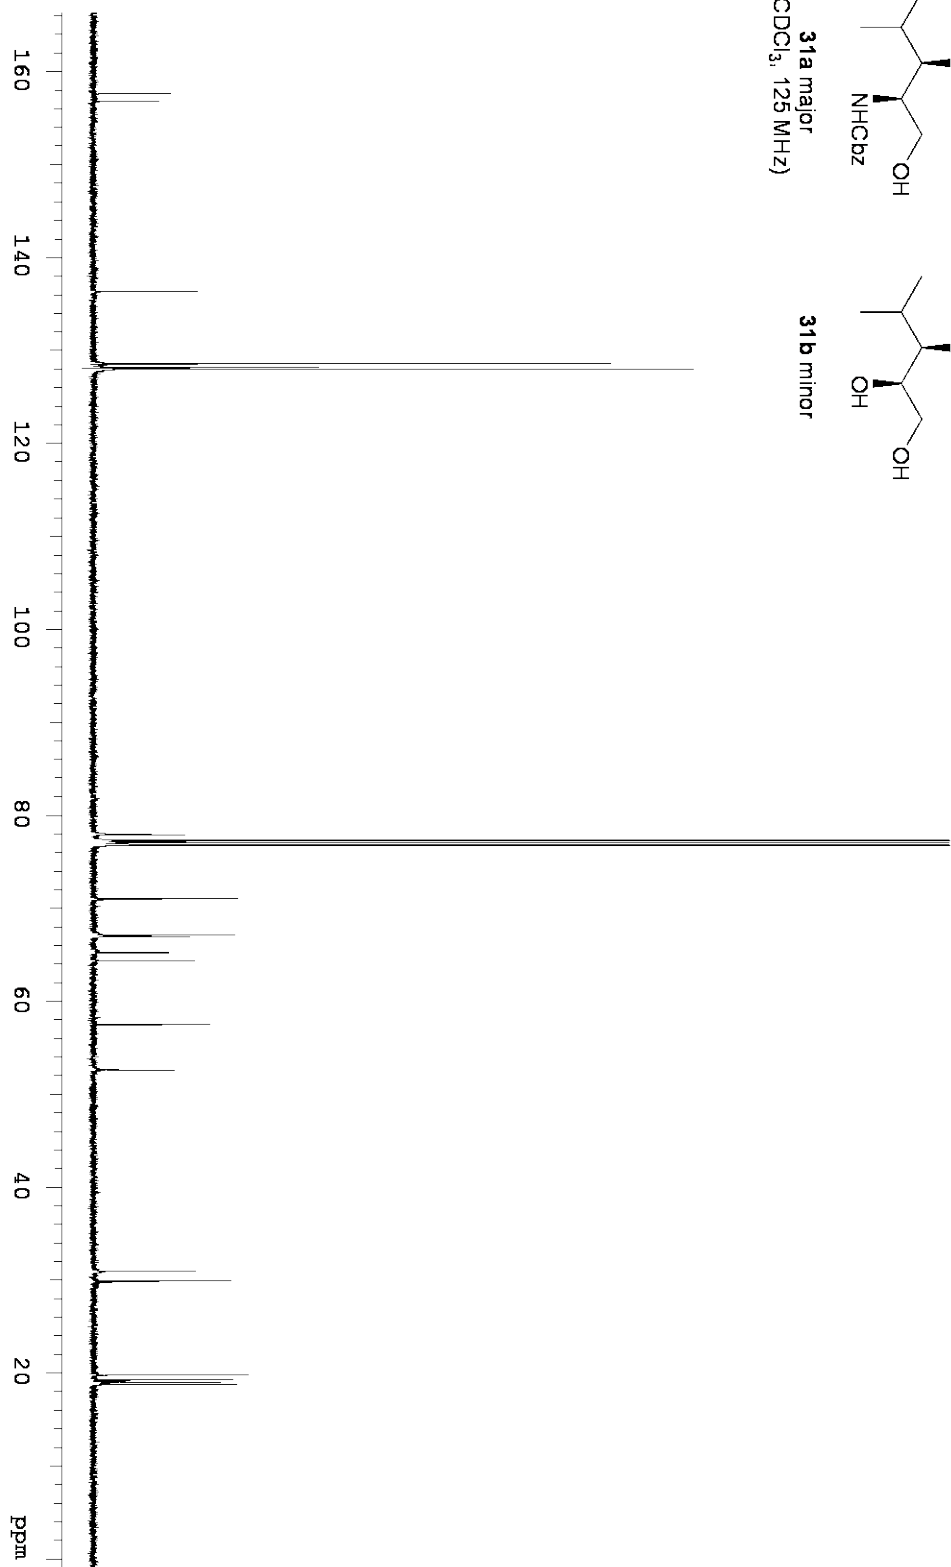

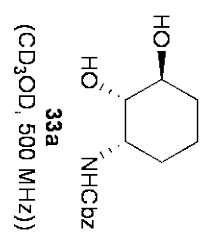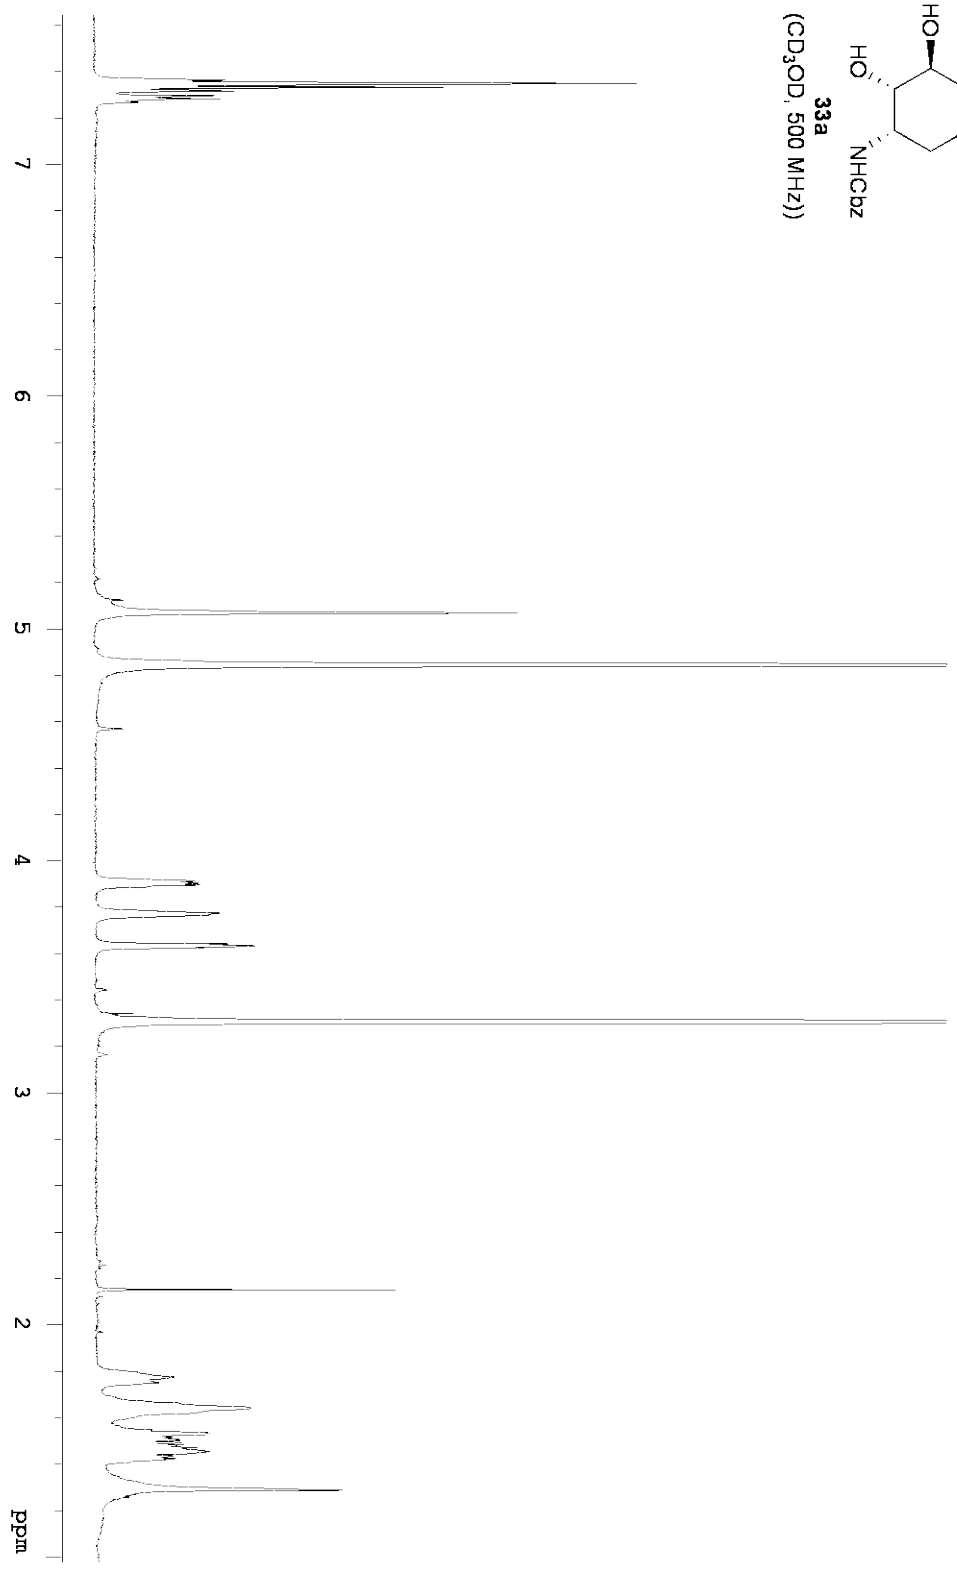

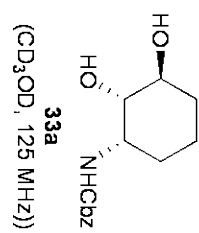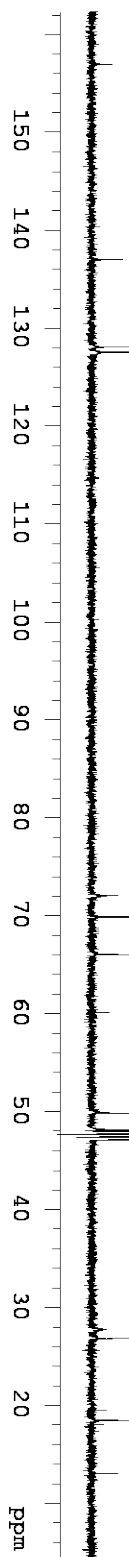

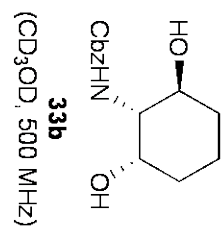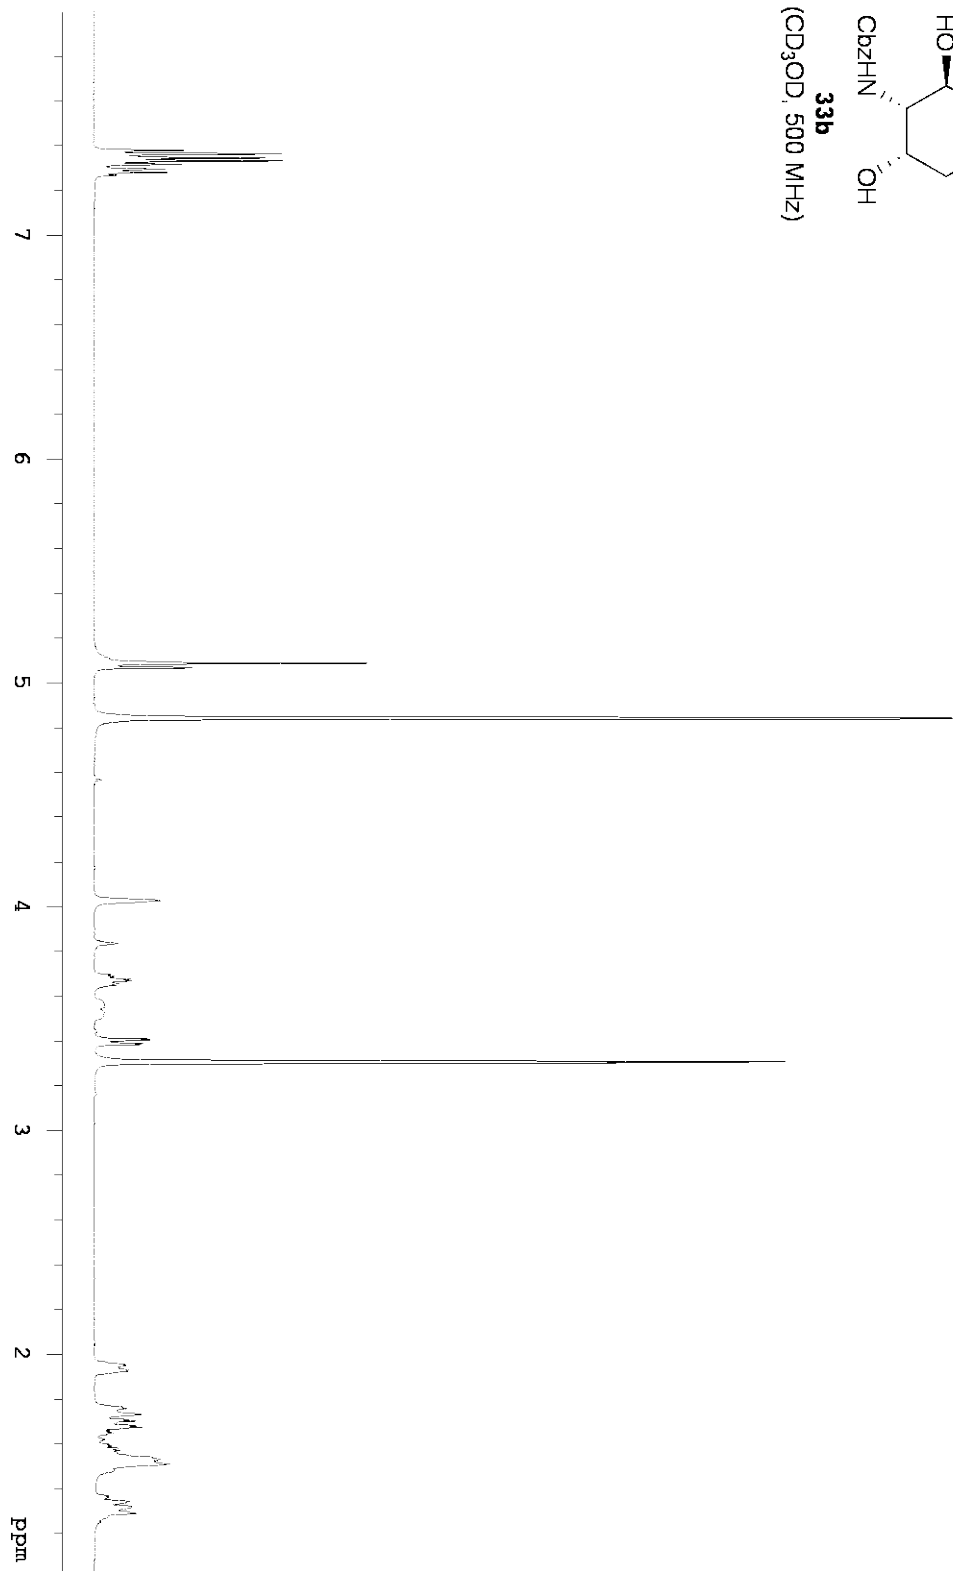

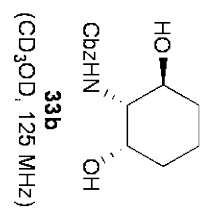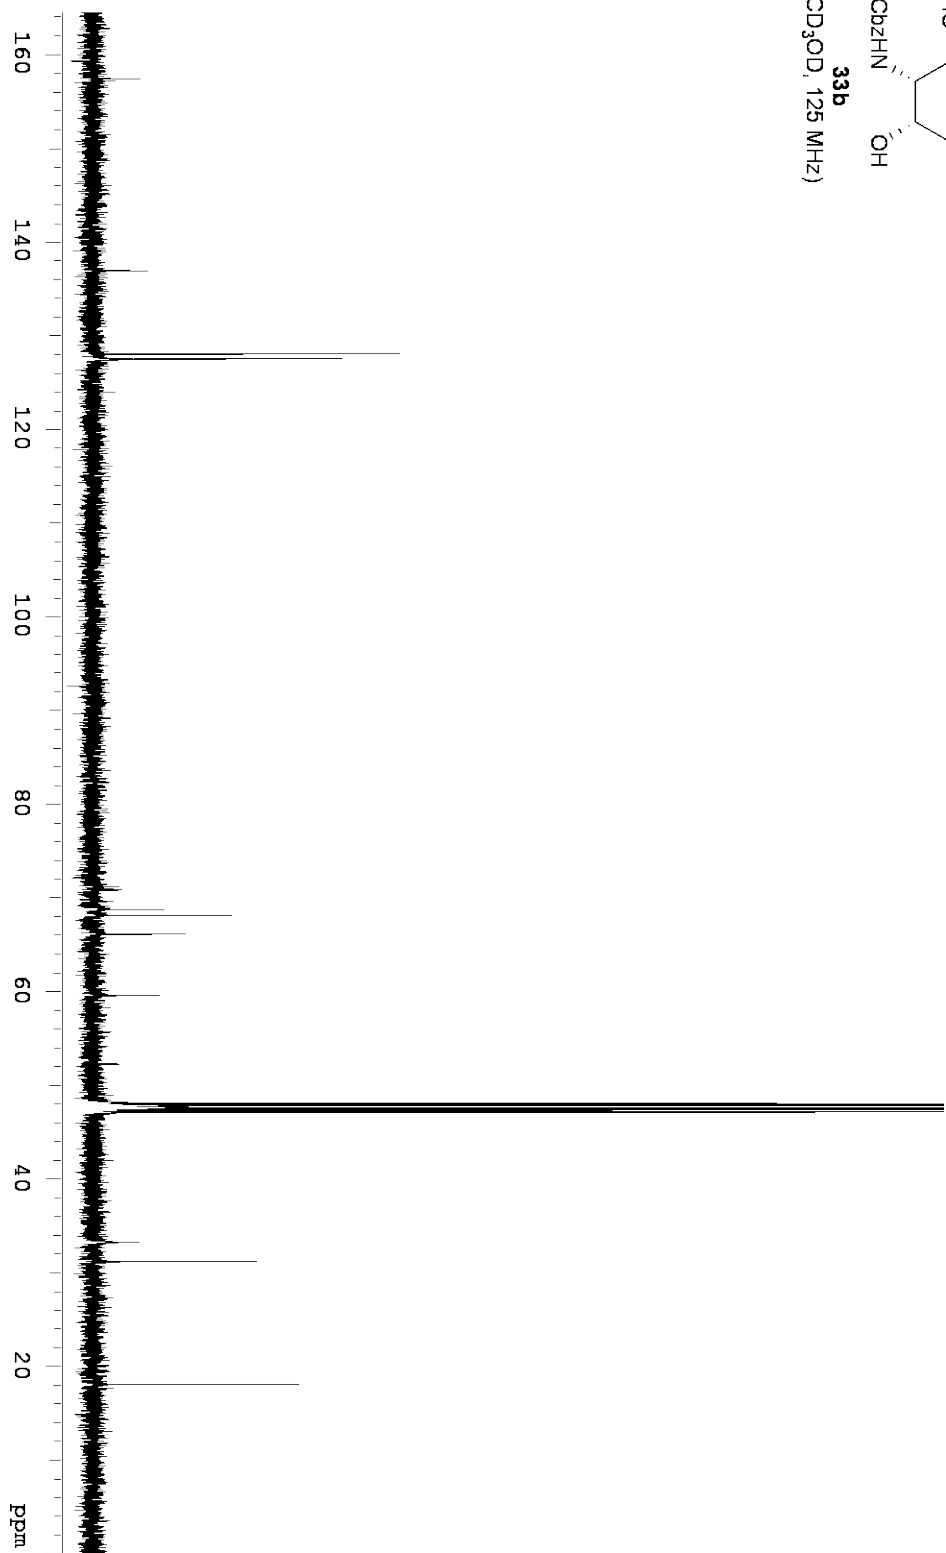

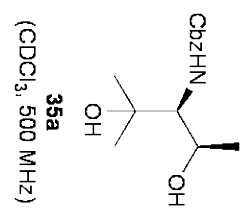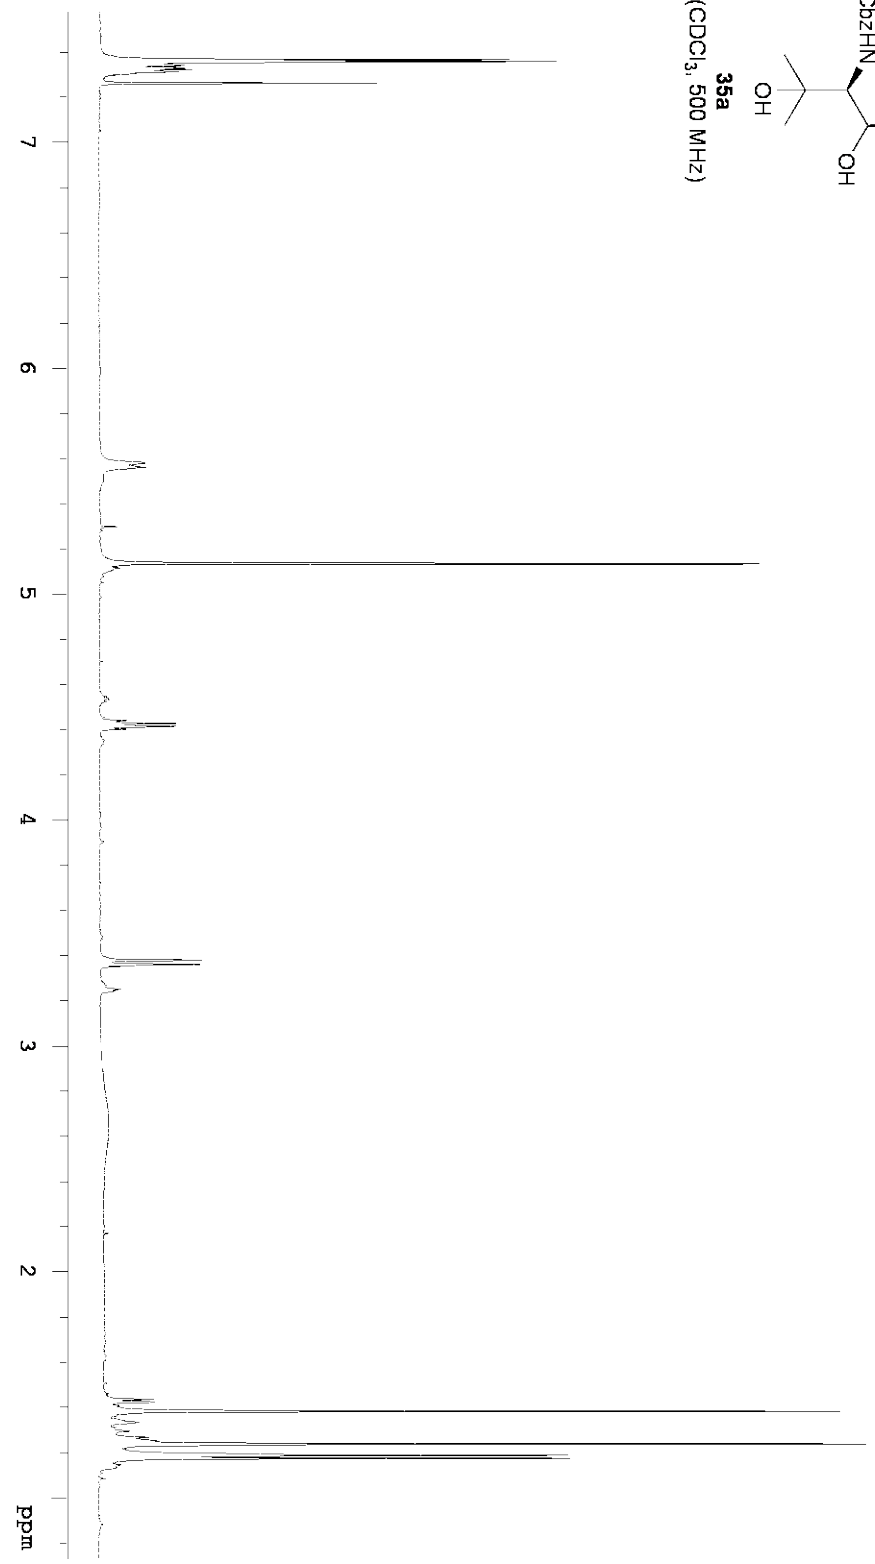



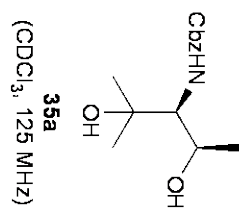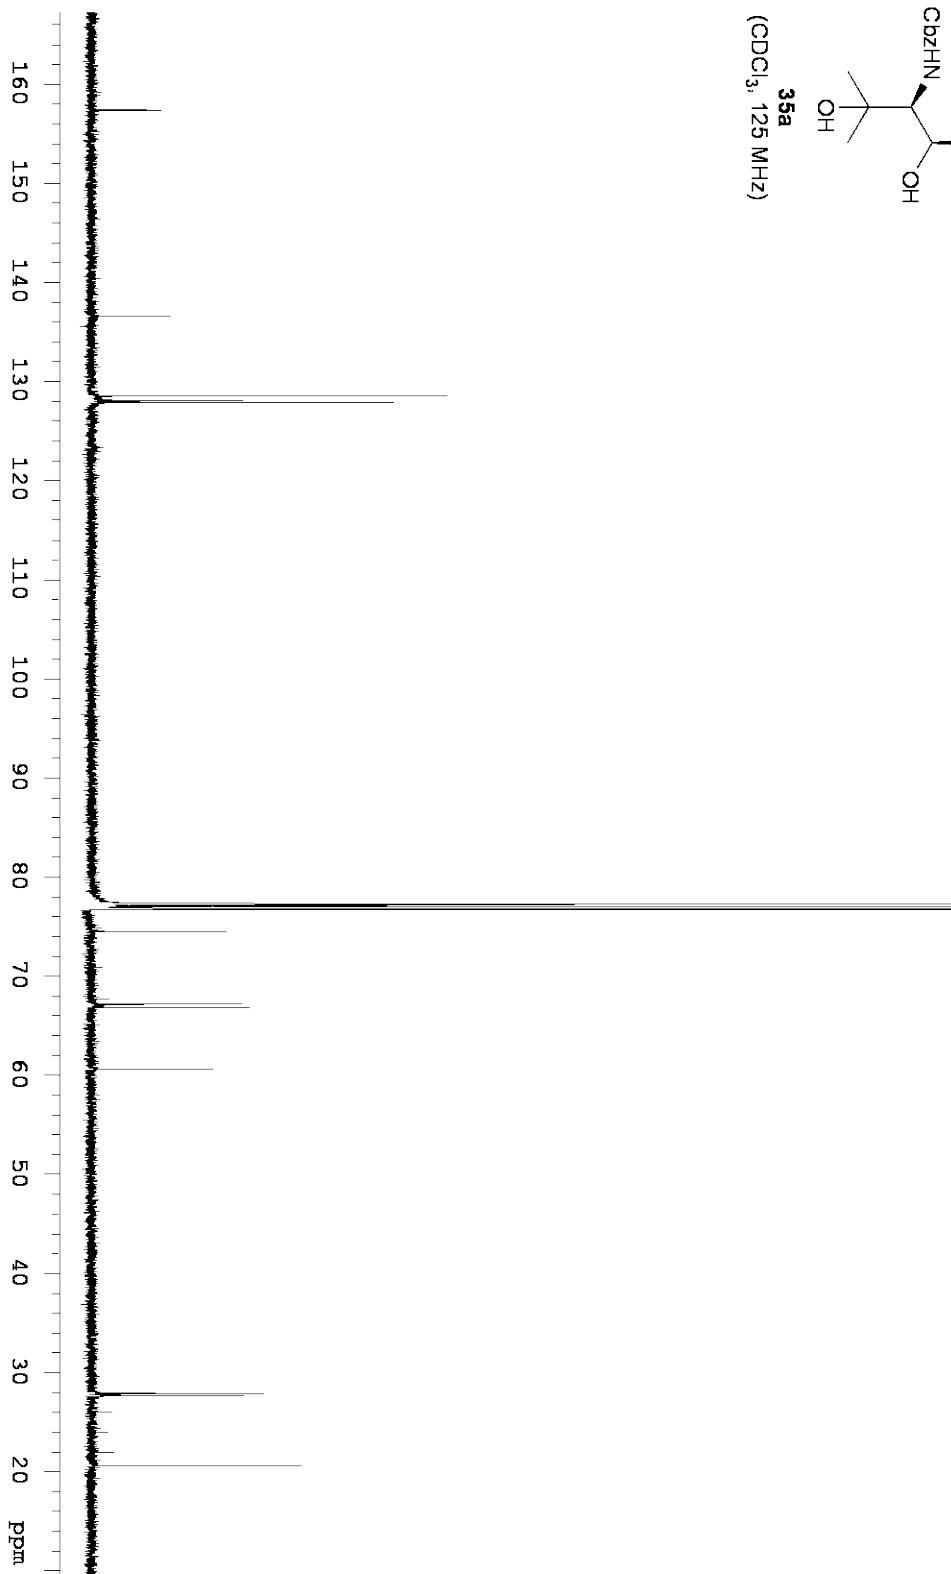

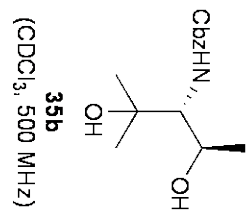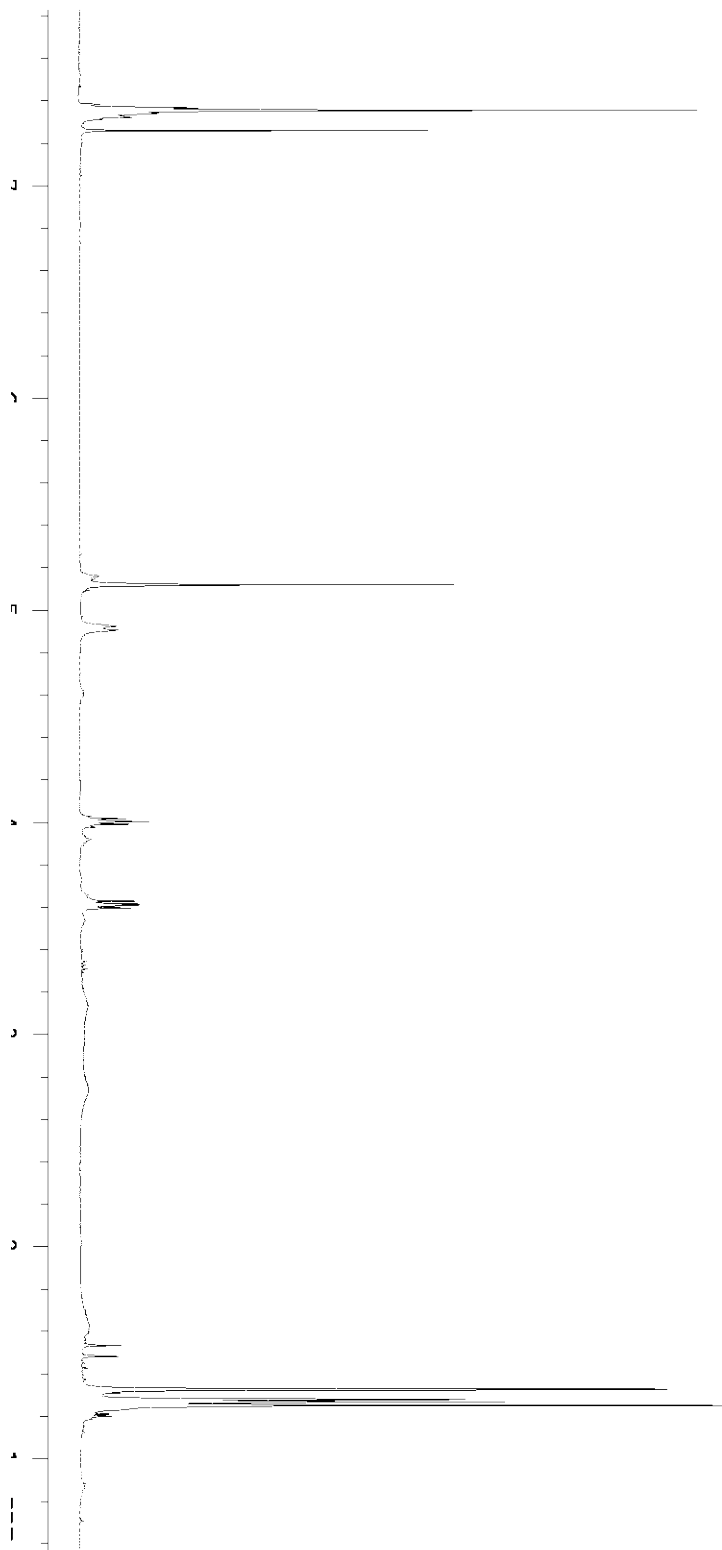

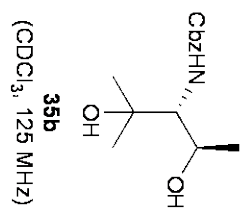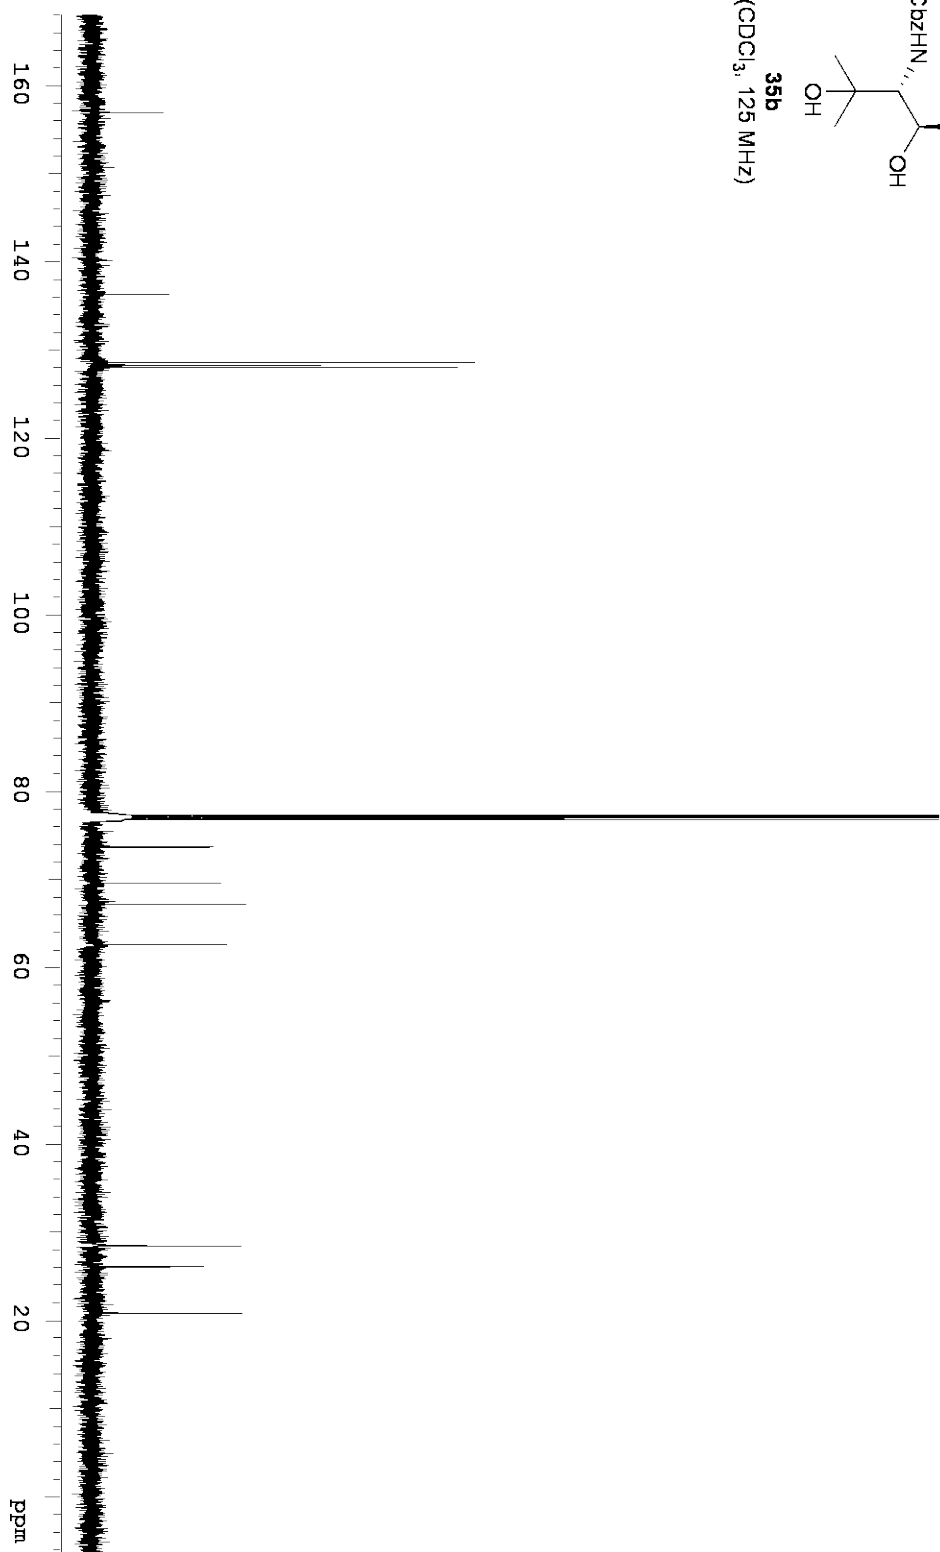

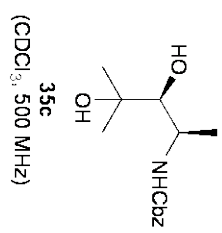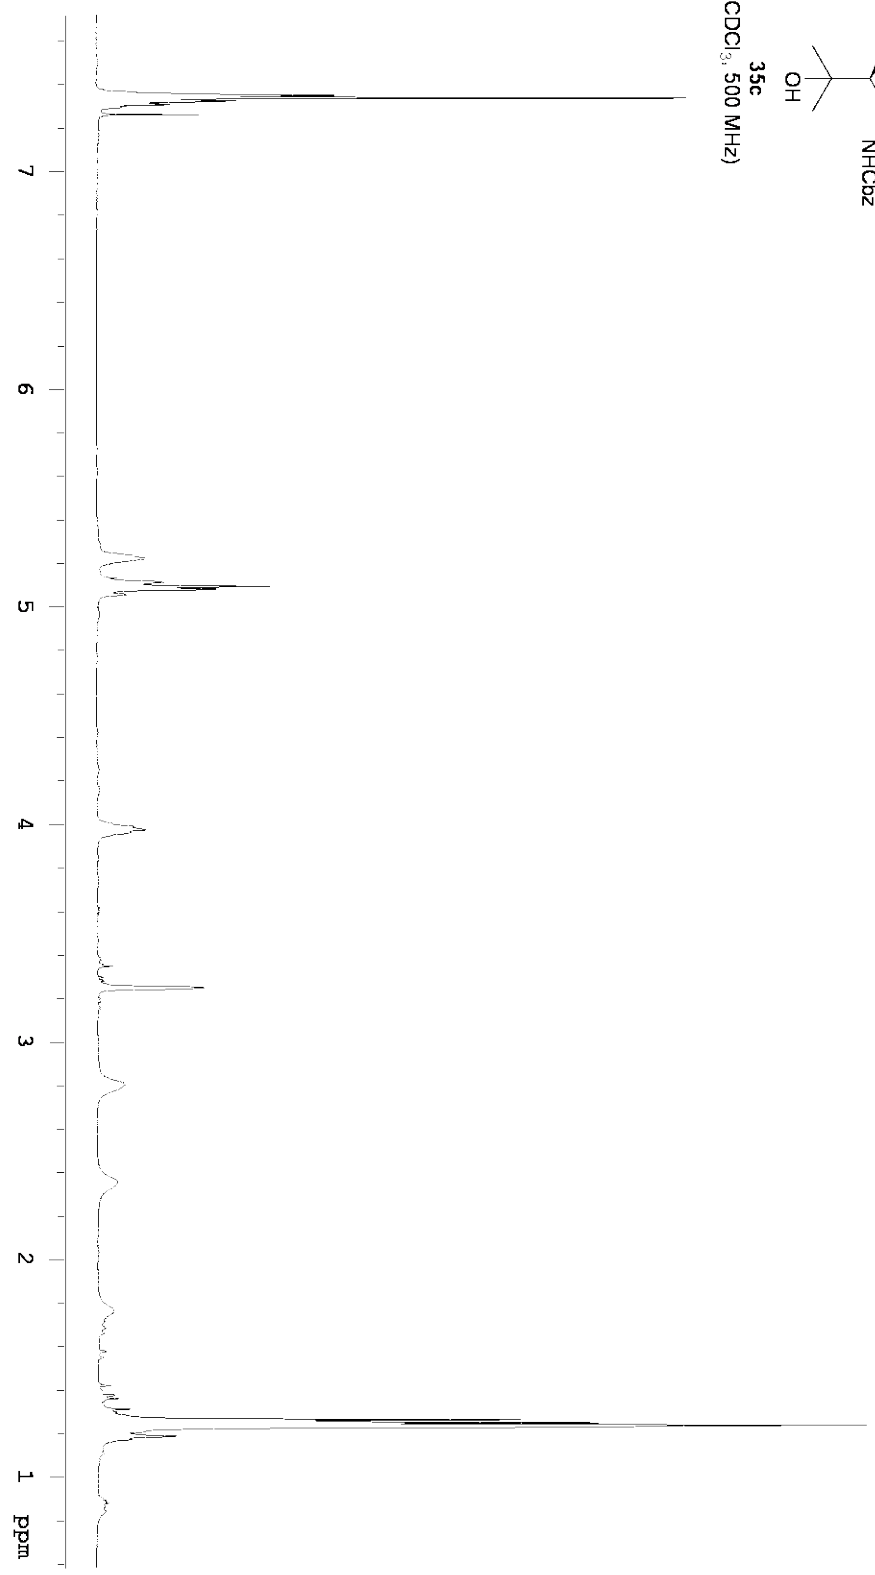

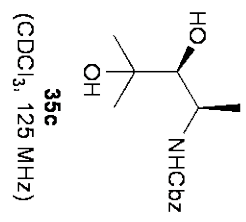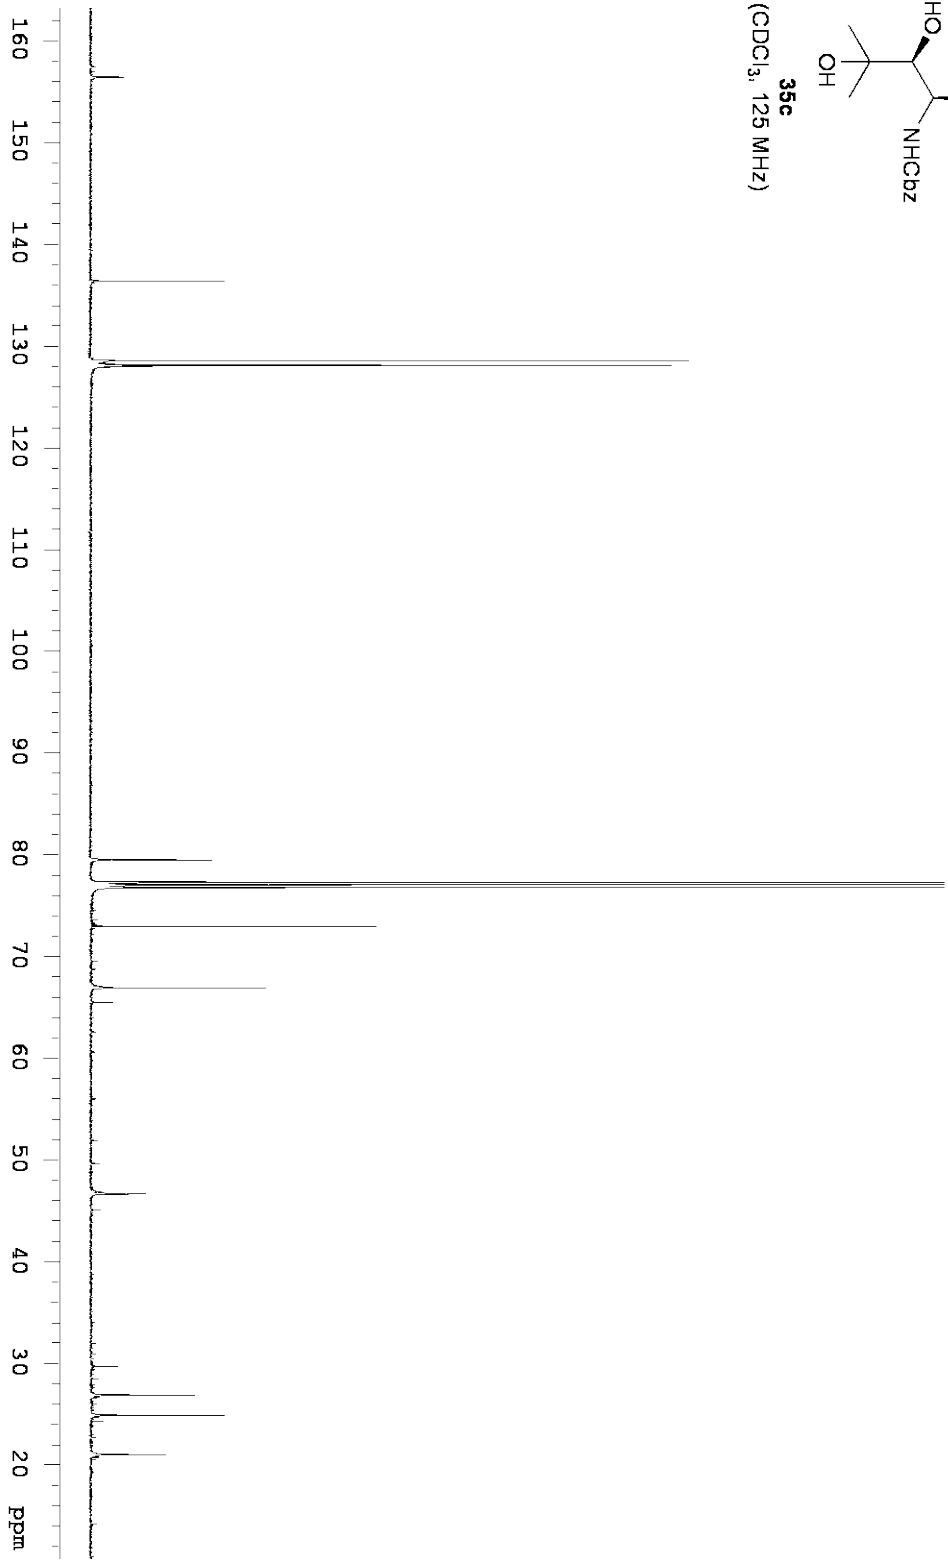

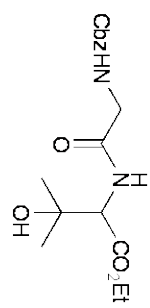

**37**  
(500 MHz, CDCl<sub>3</sub>)

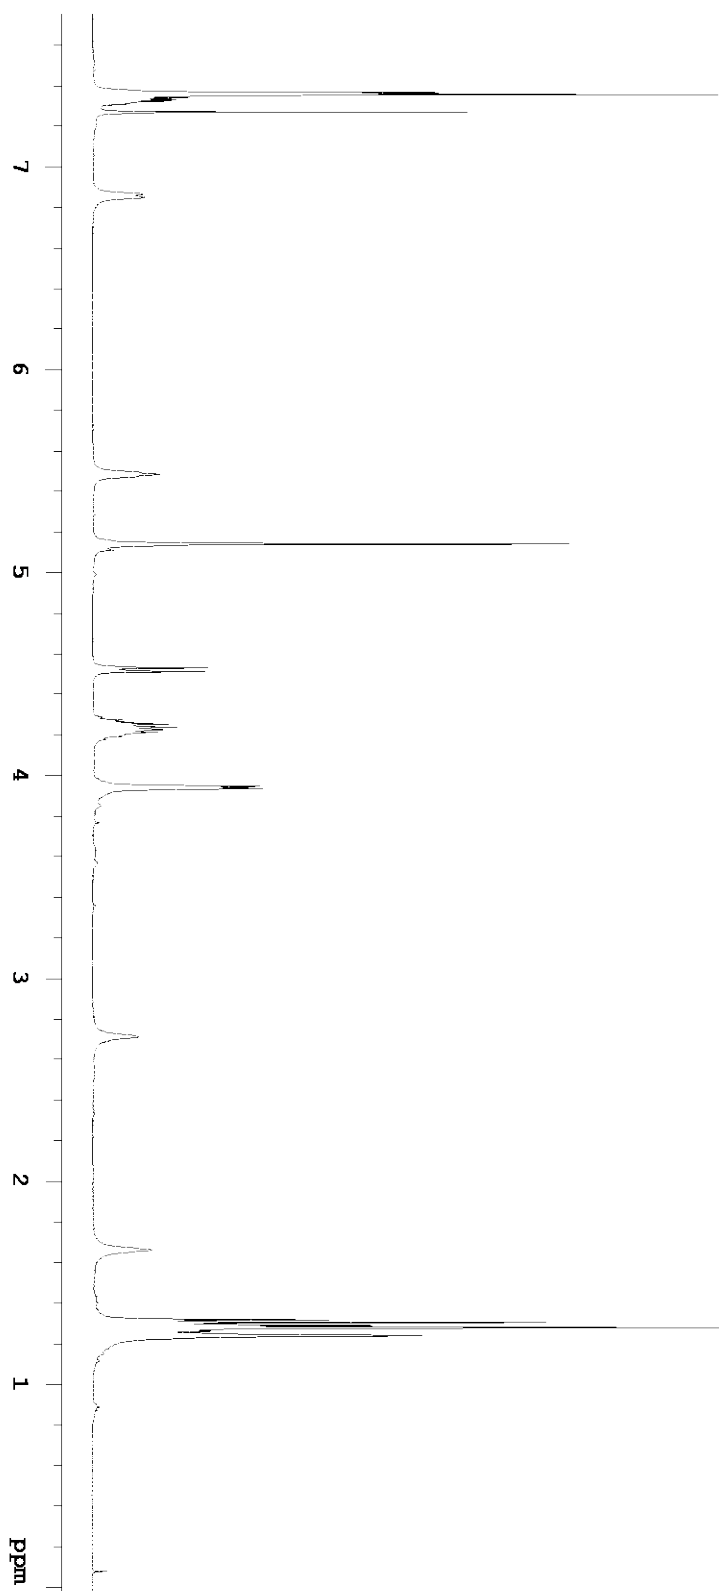

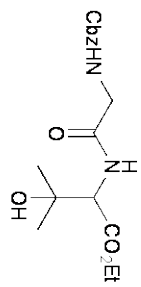

**37**  
(125 MHz, CDCl<sub>3</sub>)

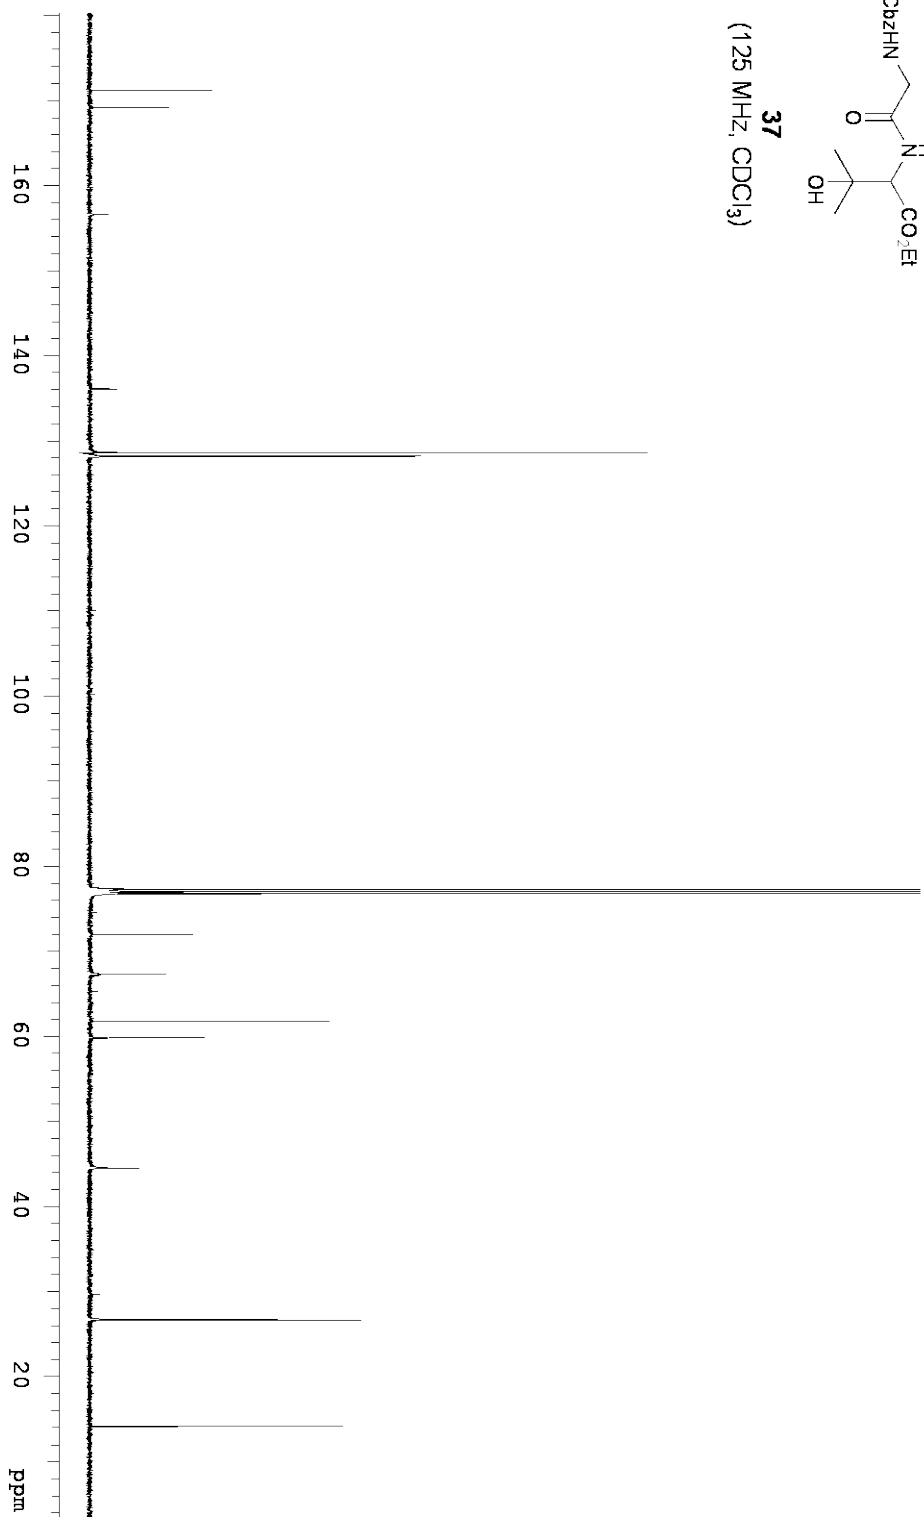

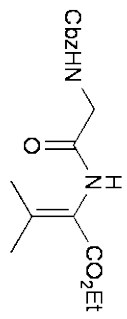

**38**  
(500 MHz, CDCl<sub>3</sub>)

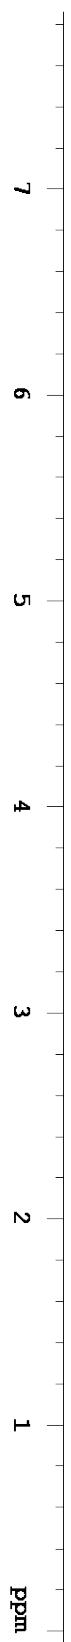



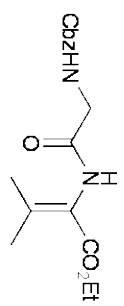

**38**  
(125 MHz, CDCl<sub>3</sub>)

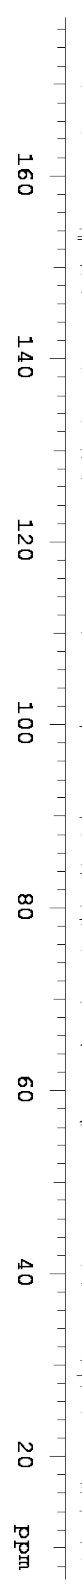

Supplement: Supplementary file 1 [file 4200637]
